# Supplementary material
Source: Royal Society of Chemistry journal article supplement (doi:10.1039/d6gc01257d)
Supplement: d6gc01257d1.pdf [file d6gc01257d1.pdf]

## **Supplementary material**

**Towards sustainable pulping of bagasse: silica migration, hexenuronic acid removal and ultrafiltration-based spent liquor utilization**

**Table S1** Applied analytics for the experimental work: **a** Bleaching-related samples; **b** Ultrafiltration-related samples; **c** Bleaching conditions and chemicals charge.

| <b>a Bleaching</b>                               |                       |                                   |       |                             |                               |             |                                              |         |
|--------------------------------------------------|-----------------------|-----------------------------------|-------|-----------------------------|-------------------------------|-------------|----------------------------------------------|---------|
| Code (Sample)                                    | Soxhlet and HPAEC-PAD | Paper sheets (optical properties) | GC-MS | UV-vis (HexA determination) | Fiber (kappa; viscosity; ISO) | SEM imaging | Fiber morphology (length; SEM-EDX; XRD; XPS) | ICP-OES |
| Fibrous bagasse (B)                              | ×                     |                                   | ×     |                             |                               | ×           |                                              | ×       |
| Water treated bagasse (B-P1)                     | ×                     |                                   | ×     |                             |                               | ×           |                                              | ×       |
| Alkali washed pulp (B-P1-P2)                     | ×                     |                                   | ×     |                             |                               |             |                                              | ×       |
| Soda cooking pulp (B-P1-P2-C)                    | ×                     | ×                                 | ×     | ×                           | ×                             | ×           | ×                                            | ×       |
| A/D <sub>0</sub>                                 | ×                     | ×                                 | ×     | ×                           | ×                             |             |                                              |         |
| A/D <sub>0</sub> -E <sub>p</sub>                 | ×                     |                                   |       |                             | ×                             |             |                                              |         |
| A/D <sub>0</sub> -E <sub>p</sub> -D <sub>1</sub> | ×                     | ×                                 |       |                             | ×                             |             |                                              |         |
| D <sub>0</sub>                                   | ×                     | ×                                 | ×     | ×                           | ×                             |             |                                              |         |
| D <sub>0</sub> -E <sub>p</sub>                   | ×                     |                                   |       |                             | ×                             |             |                                              |         |
| D <sub>0</sub> -E <sub>p</sub> -D <sub>1</sub>   | ×                     | ×                                 |       |                             | ×                             |             |                                              |         |

| <b>b Ultrafiltration</b> |       |     |     |    |         |         |                 |
|--------------------------|-------|-----|-----|----|---------|---------|-----------------|
| Code (Sample)            | GC-MS | GPC | NMR | pH | Density | ICP-OES | Residual alkali |
| Feed                     | ×     |     |     | ×  | ×       | ×       | ×               |
| Feed lignin              | ×     | ×   | ×   |    |         |         |                 |
| Permeate                 | ×     |     |     | ×  | ×       | ×       | ×               |
| Permeate lignin          | ×     | ×   | ×   |    |         |         |                 |
| Retentate                | ×     |     |     | ×  | ×       | ×       | ×               |
| Retentate lignin         | ×     | ×   | ×   |    |         |         |                 |

**c Bleaching conditions and chemicals charge**

| Bleaching Sequence                               | Stage            | T (°C) | t (min) | Const (%) | ClO <sub>2</sub> (%) | H <sub>2</sub> SO <sub>4</sub> (%) | NaOH (%) | H <sub>2</sub> O <sub>2</sub> (%) |
|--------------------------------------------------|------------------|--------|---------|-----------|----------------------|------------------------------------|----------|-----------------------------------|
| D <sub>0</sub> -E <sub>p</sub> -D <sub>1</sub>   | D <sub>0</sub>   | 55     | 40      | 10        | 3.2                  | 0.3                                | -        | -                                 |
|                                                  | E <sub>p</sub>   | 75     | 120     | 10        | -                    | -                                  | 2.0      | 0.3                               |
|                                                  | D <sub>1</sub>   | 75     | 180     | 10        | 2.0                  | -                                  | -        | -                                 |
| A/D <sub>0</sub> -E <sub>p</sub> -D <sub>1</sub> | A/D <sub>0</sub> | 90     | 140     | 10        | 2.0                  | 0.7                                | -        | -                                 |
|                                                  | E <sub>p</sub>   | 75     | 120     | 10        | -                    | -                                  | 2.0      | 0.3                               |
|                                                  | D <sub>1</sub>   | 75     | 180     | 10        | 2.0                  | -                                  | -        | -                                 |

**Table S2.** The quantitative profile of the crude extracts calculated based on the fibrous bagasse (B, **Table S1**): 1) dichloromethane (D) and 2) acetone (A) extractables of bagasse, and the 3) pretreated fraction of B-P1; as well as 4) B-P1-P2.

| Code | Retention time, min | Compounds, detected as TMS ester/ether (TMS) derivatives              | w/w, mg/g bagasse |      |      |         | MW      | Characteristic fragments m/z                  | Databases |
|------|---------------------|-----------------------------------------------------------------------|-------------------|------|------|---------|---------|-----------------------------------------------|-----------|
|      |                     |                                                                       | D-B1              | A-B1 | B-P1 | B-P1-P2 |         |                                               |           |
| 1    | 7.168               | Lactic acid (TMS ether; TMS ester)                                    |                   |      | 0.17 |         | 23      | 219; 191; 147; 117; 73                        | [N]       |
| 2    | 7.637               | Glycolic acid (TMS ether; TMS ester)                                  |                   |      | 0.08 | 0.87    | 22      | 205; 177; 147; 73                             | [N]       |
| 3    | 9.647               | Oxalic acid (TMS ether; TMS ester)                                    |                   |      |      | 0.39    | 23      | 219; 190; 147; 73                             | [N]       |
| 4    | 9.988               | Hydracrylic acid (TMS ether; TMS ester)                               |                   |      |      | 0.51    | 23      | 219; 177; 147; 73                             | [N]       |
| 5    | 14.614              | 1-Dimethylvinylsilyloxy-3-methylbenzene                               |                   | 0.03 |      |         | 19      | 192; 177                                      | [N]       |
| 6    | 14.656              | L-Isoleucine (N-TMS; TMS ester)                                       |                   |      | 0.05 |         | 27      | 260; 232; 218; 158; 73                        | [N]       |
| 7    | 14.755              | Phosphoric acid (tri TMS ether)                                       |                   |      |      | 0.11    | 31      | 314; 299; 283; 211; 133; 73                   | [N]       |
| 8    | 15.052              | Glycerol (tri TMS ether)                                              |                   | 0.02 | 0.13 | 0.56    | 30      | 293; 218; 205; 147; 73                        | [N]       |
| 9    | 15.943              | Succinic acid (di TMS ether)                                          |                   |      |      | 0.099   | 26      | 262; 247; 147; 129; 73                        | [N]       |
| 10   | 16.82               | Glyceric acid (diTMS ether; TMS ester)                                |                   |      |      | 0.19    | 32      | 307; 292; 205; 189; 147; 133; 103;            | [N]       |
| 11   | 17.805              | 4-Hydroxybenzaldehyde                                                 | 0.01              | 0.01 |      | 0.67    | 19      | 194; 179; 151                                 | [N]       |
| 12   | 18.863              | Tartronic acid (TMS ether, di TMS ester)                              |                   |      |      | 0.07    | 33      | 321; 292; 221; 147; 133; 102; 73              | [N]; [A]  |
| 13   | 19.514              | 2,4-Dihydroxybutanoic acid (di TMS ether; TMS                         |                   |      |      | 0.31    | 33      | 321; 219; 203; 147; 129; 103; 73              | [N]       |
| 14   | 20.175              | 3,4-Dihydroxybutanoic acid (di TMS ether; TMS                         |                   |      |      | 0.51    | 33      | 321; 233; 189; 147; 133; 117; 101;            | [N]       |
| 15   | 21.989              | Malic acid (TMS ether; di TMS ester)                                  |                   |      | 0.07 | 0.13    | 35      | 335; 307; 245; 233; 147; 73                   | [N]       |
| 16   | 25.762              | Phenylalanine (N-TMS; TMS ester)                                      |                   |      | 0.03 |         | 30      | 294; 266; 218; 192; 147; 100; 73              | [N]       |
| 17   | 25.8                | L-Glutamic acid (N-TMS; diTMS ester)                                  |                   |      | 0.09 |         | 36      | 363; 348; 246; 156; 147; 128; 73              | [N]       |
| 18   | 26.349              | Xyloisosaccharinic acid (XISA) (tri TMS ether; TMS ester)             |                   |      |      | 0.011   | 43<br>8 | 423; 333; 321; 305; 231; 147; 103;<br>73      | 17        |
| 19   | 27.335              | 3-Deoxy-pentonic acid (tri TMS ether, TMS ester)                      |                   |      |      | 0.39    | 43      | 423; 335; 305; 245; 205; 147; 133;            | 17        |
| 20   | 27.376              | 3-Deoxy-pentarcic acid (di TMS ether, di TMS ester)                   |                   |      |      | 0.11    | 45<br>2 | 437; 409; 379; 305; 245; 217; 147;<br>103; 73 | 17        |
| 21   | 31.462              | citric acid (TMS ether; triTMS ester)                                 |                   |      | 0.06 |         | 48      | 465; 375; 363; 347; 273; 147; 73              | [N]       |
| 22   | 32.614              | Quinic acid (quarTMS ether; TMS ester)                                |                   |      |      | 0.08    | 55      | 345; 255; 191; 147; 73                        | [N]       |
| 23   | 33.083              | 3-Hydroxy-3-(4-hydroxyphenyl) propanoic acid (diTMS ether; TMS ester) |                   |      |      | 0.09    | 39<br>8 | 398; 341; 267; 147; 73                        | [N]       |
| 24   | 33.448              | Glucose (penta TMS ether)                                             |                   |      | 0.07 |         | 54      | 435; 305; 217; 204; 191; 147; 129;            | [N]       |
| 25   | 34.023              | 4-Coumaric acid (TMS ether; TMS ester)                                |                   | 0.17 | 0.24 | 5.544   | 30      | 308; 293; 249; 219                            | [N]       |

|    |        |                                               |      |      |      |      |    |                                      |           |
|----|--------|-----------------------------------------------|------|------|------|------|----|--------------------------------------|-----------|
| 26 | 34.094 | trans-Coniferyl alcohol (di TMS ether)        |      | 0.02 |      |      | 32 | 324; 309; 293; 235; 204; 73          | [N]       |
| 27 | 35.586 | Methylpentadecanoic acid/C16:0 branched (TMS) | 0.01 |      |      |      | 32 | 328; 313; 145; 132; 117; 75; 73      | [N]; [J]  |
| 28 | 35.735 | Glucose (penta TMS ether)                     |      |      | 0.10 |      | 54 | 435; 305; 217; 204; 191; 147; 129;   | [N]       |
| 29 | 36.45  | Palmitic acid/C16:0 (TMS ester)               | 0.05 | 0.04 |      |      | 32 | 328; 313; 145; 132; 117; 75; 73      | [N]; [J]; |
| 30 | 37.453 | Ferulic acid (TMS ether; TMS ester)           |      |      |      | 0.63 | 33 | 338; 323; 308; 249; 219; 73          | [N]       |
| 31 | 37.555 | trans-Sinapyl alcohol (di TMS ether)          |      | 0.01 |      |      | 35 | 354; 339; 323; 73                    | [N]       |
| 32 | 40.128 | Linoleic acid (TMS ester)                     | 0.00 |      |      |      | 35 | 352; 337; 262; 220; 150; 129; 117;   | [N];      |
| 33 | 40.252 | Oleic acid (TMS ester)                        | 0.02 | 0.01 |      |      | 35 | 354; 339; 264; 222; 199; 145; 129;   | [N]; [A]  |
| 34 | 40.83  | Stearic acid/C18:0 (TMS ester)                | 0.02 | 0.01 |      |      | 35 | 356; 341; 145; 132; 129; 117; 75; 73 | [N]; [J]; |
| 35 | 44.884 | Arachidic acid/C20:0 (TMS ester)              | 0.01 | 0.01 |      |      | 38 | 384; 369; 145; 132; 129; 117; 75     | [N]       |
| 36 | 47.974 | 1-Monopalmitin (di TMS ether)                 | 0.01 |      |      |      | 47 | 459; 371; 239; 205; 147; 129; 73     | [N]       |
| 37 | 48.645 | Behenic acid/C22:0 (TMS ester)                | 0.01 | 0.00 |      |      | 41 | 412; 397; 145; 132; 129; 117; 75; 73 | [N]       |
| 38 | 49.682 | Sucrose (nona TMS ether)                      |      |      |      | 0.71 | 91 | 451; 437; 361                        | [N]       |
| 39 | 51.563 | Trehalose (nona TMS ether)                    |      |      | 1.22 | 0.14 | 91 | 451; 437; 361                        | [A]       |
| 40 | 52.16  | Lignoceric acid/C24:0 (TMS ester)             | 0.01 | 0.01 |      |      | 44 | 440; 425; 145; 132; 129; 117; 73     | [N]       |
| 41 | 53.965 | 1-Hexacosanol (TMS ether)                     | 0.02 |      |      |      | 45 | 439; 75                              | [N]       |
| 42 | 55.443 | hexacosanoic acid/ C26:0 (TMS ester)          |      | 0.01 |      |      | 46 | 468; 453; 145; 132; 129; 117         | [N]       |
| 43 | 57.175 | 1-Octacosanol (TMS ether)                     | 0.17 | 0.01 |      |      | 48 | 467; 75                              | [N]       |
| 44 | 58.552 | Octacosanoic acid / C28:0 (TMS ester)         | 0.01 | 0.03 |      |      | 49 | 496; 481; 145; 132; 117              | [N]       |
| 45 | 58.992 | Campesterol (TMS ether)                       | 0.03 |      |      |      | 47 | 472; 457; 382; 367; 343; 255; 129;   | [N]       |
| 46 | 59.474 | Stigmasterol (TMS ether)                      | 0.03 |      |      |      | 48 | 484; 469; 394; 379; 351; 255; 129    | [N]       |
| 47 | 60.102 | 1-Triacontanol (TMS ether)                    | 0.02 |      |      |      | 51 | 495; 75                              | [N]       |
| 48 | 60.348 | $\beta$ -Sitosterol (TMS ether)               | 0.06 |      |      |      | 48 | 486; 471; 396; 381; 357; 129; 73     | [N]; [A]  |
| 49 | 61.599 | Triacontanoic acid/ C30:0 (TMS ester)         |      | 0.01 |      |      | 52 | 524; 509; 201; 145; 132; 129; 117    | [N]       |

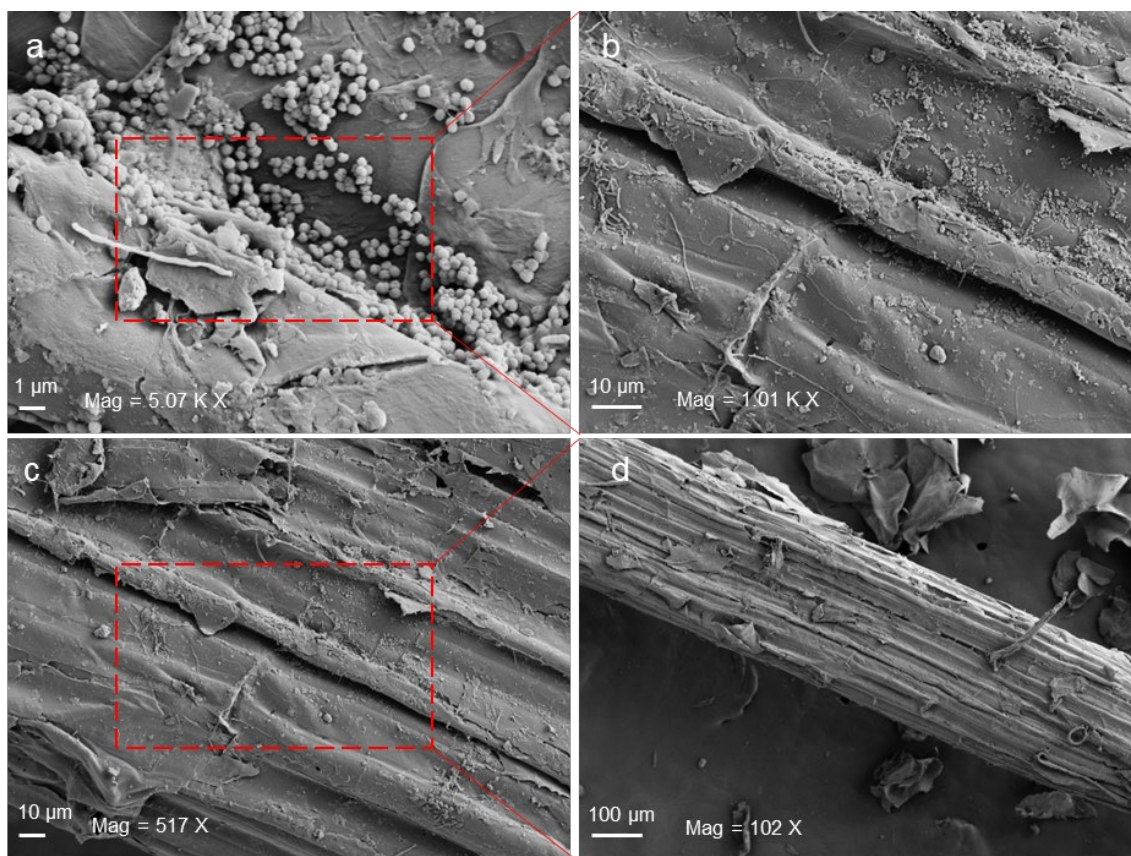

**Fig. S1** SEM imaging at the increasing magnification (a->d) of fibrous bagasse B (Table S1)

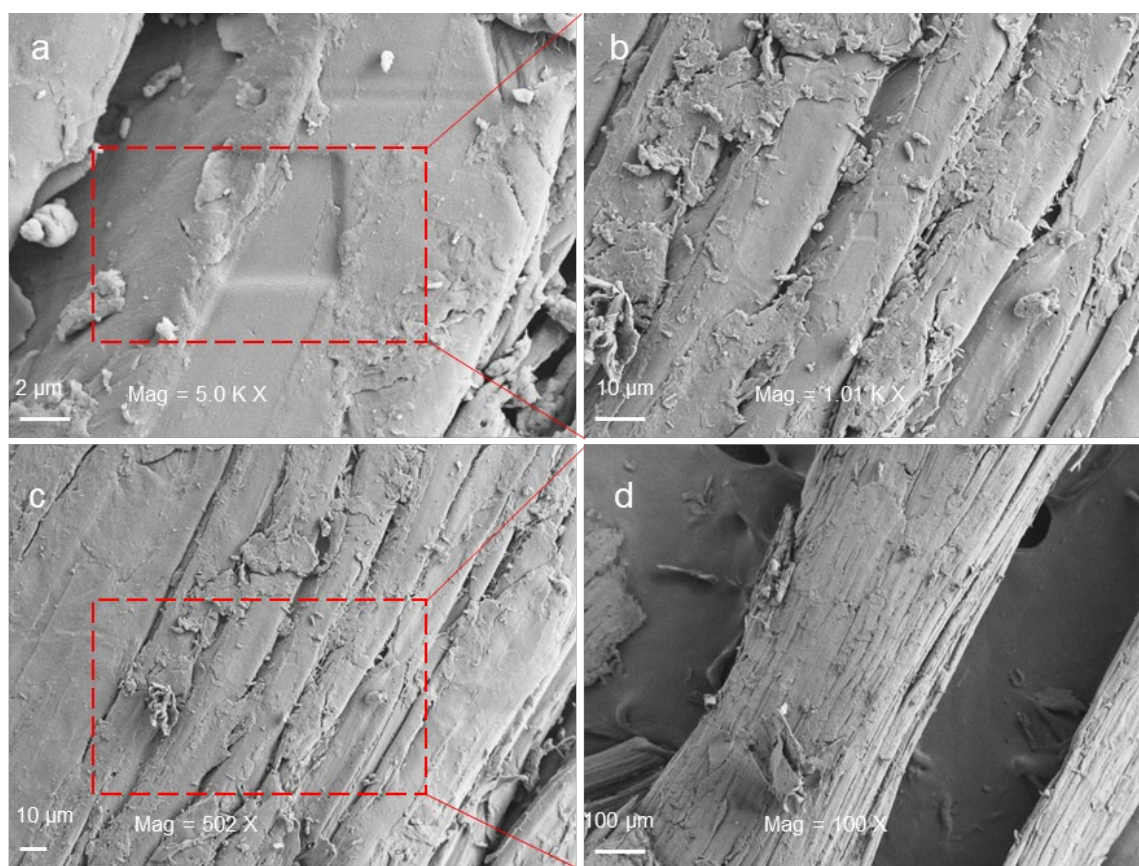

**Fig. S2** SEM imaging at increasing magnification (a->d) of hot water-washed bagasse (B-P1) (Table S1)

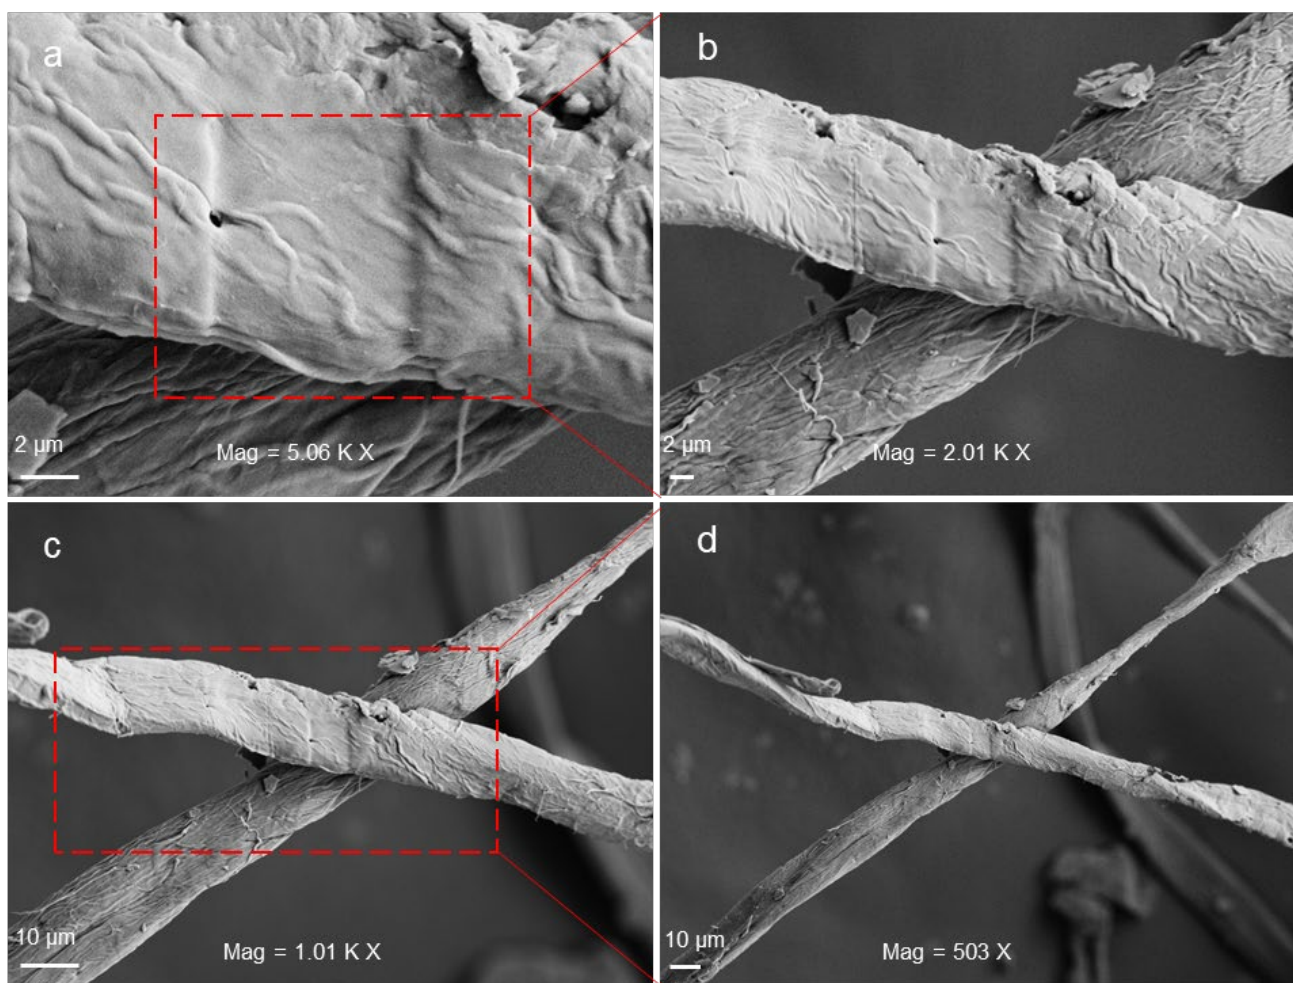

**Fig. S3** SEM imaging at increasing magnification (a->d) of cooked pulp (B-P1-P2-C) (Table S1)

**Table S3** Fiber morphology acquisition from Valmet Fiber Image Analyser FS 5.

| Codes              | Full name                            | Number | Unit |
|--------------------|--------------------------------------|--------|------|
| Lc(n) [mm]         | Arithmetic average fiber length      | 0.501  | mm   |
| Lc(l) [mm]         | Length-weighted fiber length         | 0.992  | mm   |
| Lc(w) [mm]         | Weight-weighted average fiber length | 1.645  | mm   |
| Lc(n) ISO [mm]     |                                      | 0.638  | mm   |
| Lc(l) ISO [mm]     |                                      | 1.067  | mm   |
| Lc(w) ISO [mm]     |                                      | 1.663  | mm   |
| Fiber width [μm]   | Width                                | 21.02  | um   |
| Aspect ratio       |                                      | 47     |      |
| Aspect ratio (ISO) |                                      | 51     |      |
| Curl %             |                                      | 7.93   | %    |

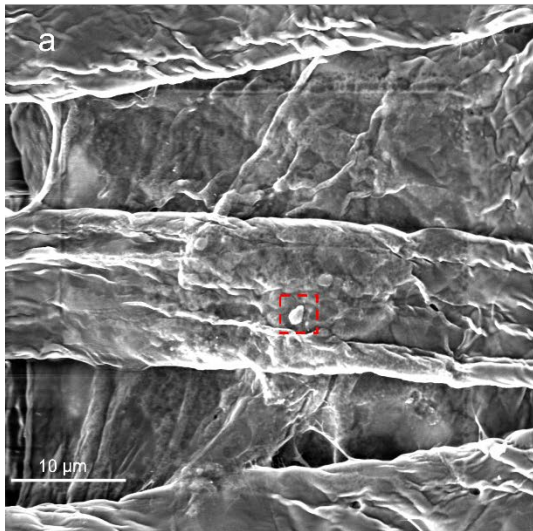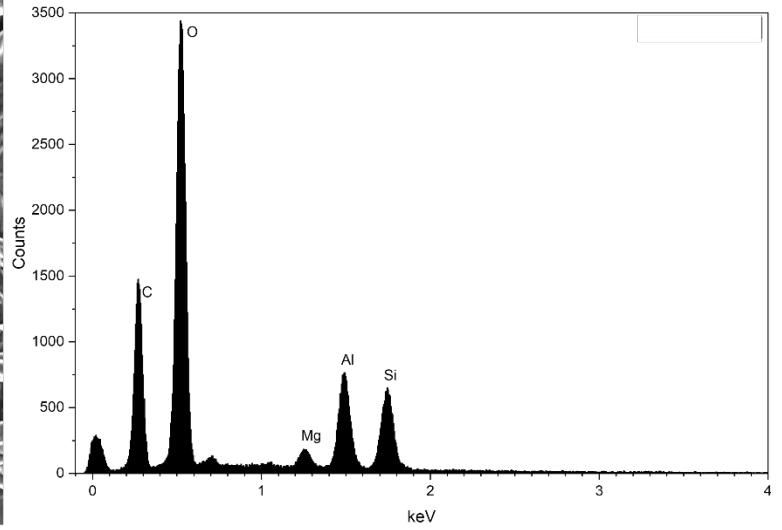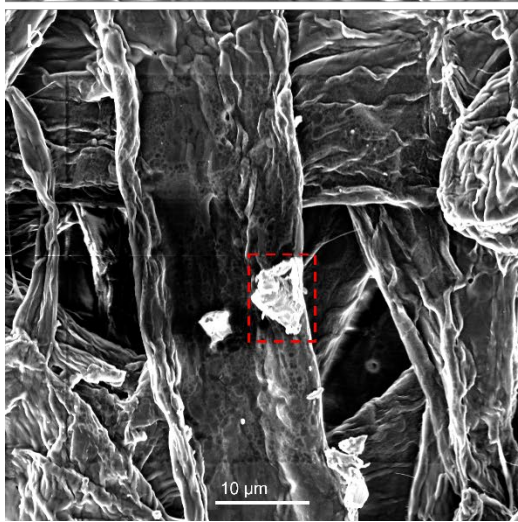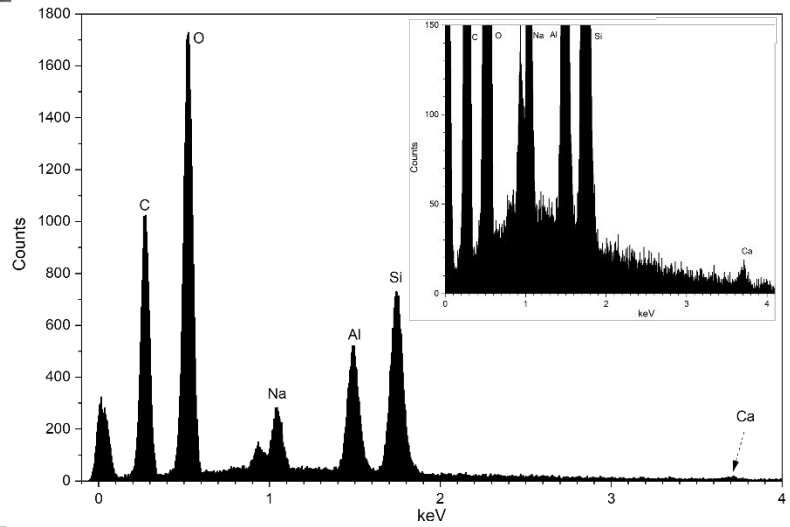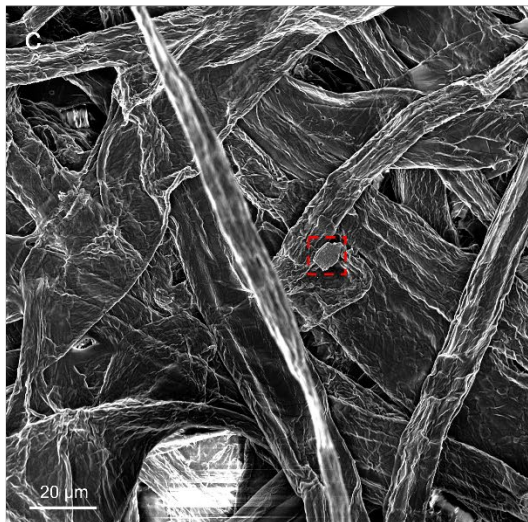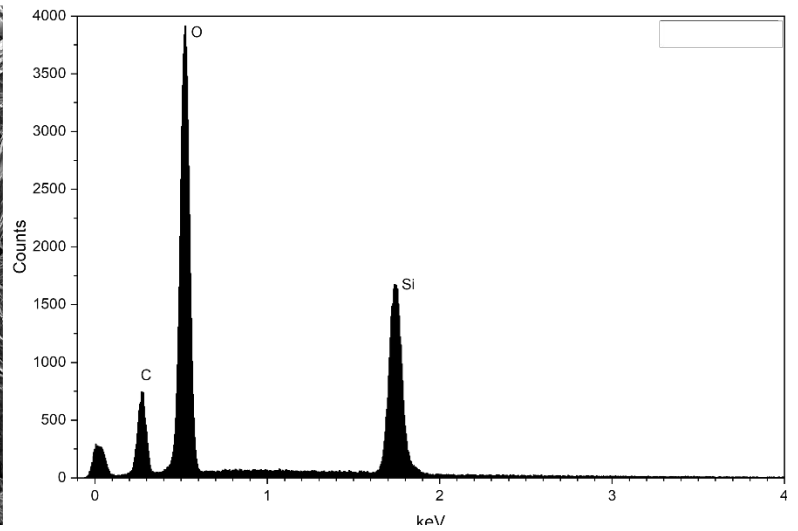

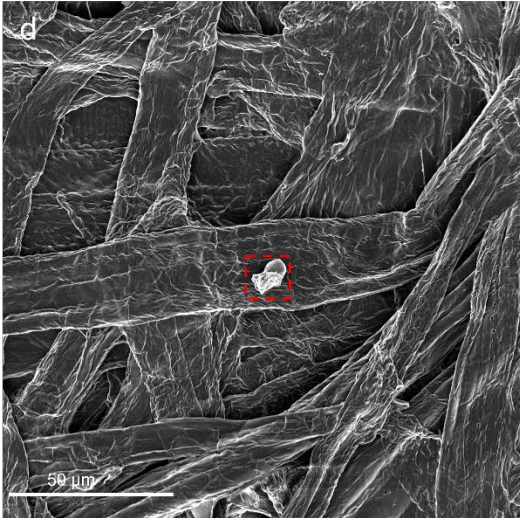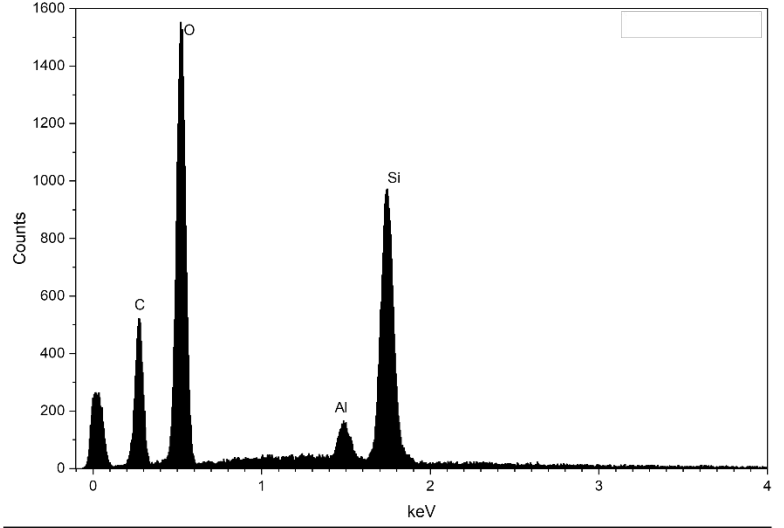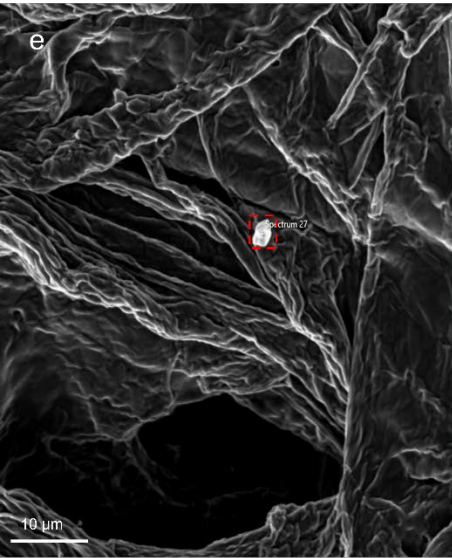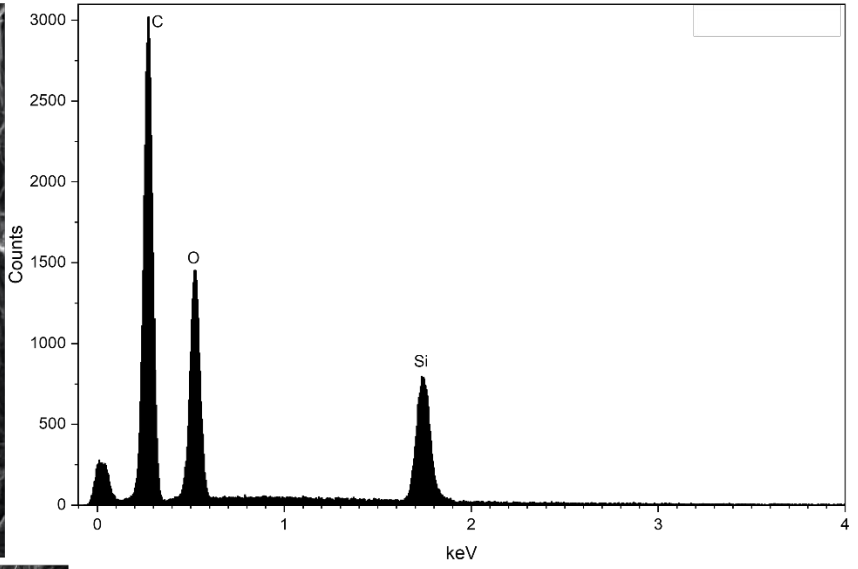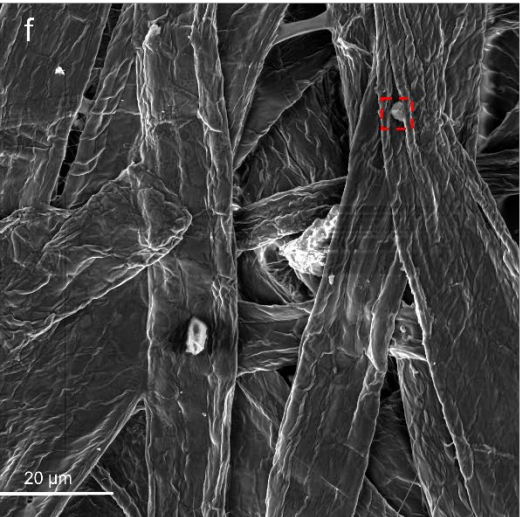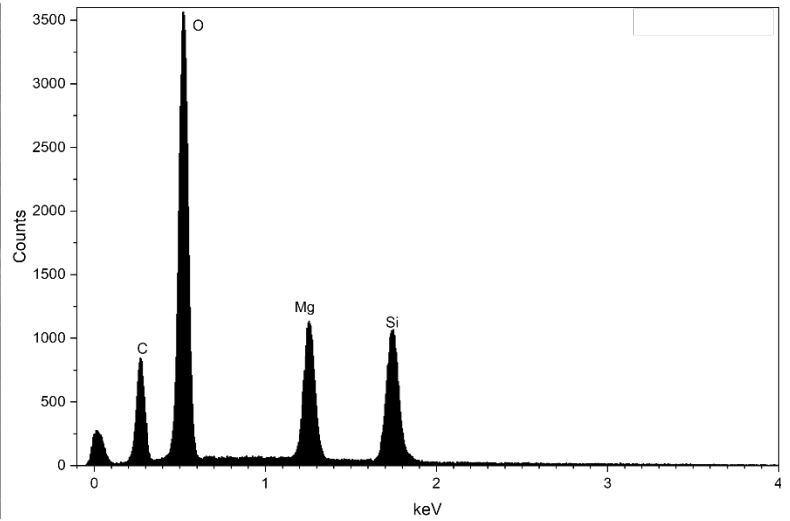

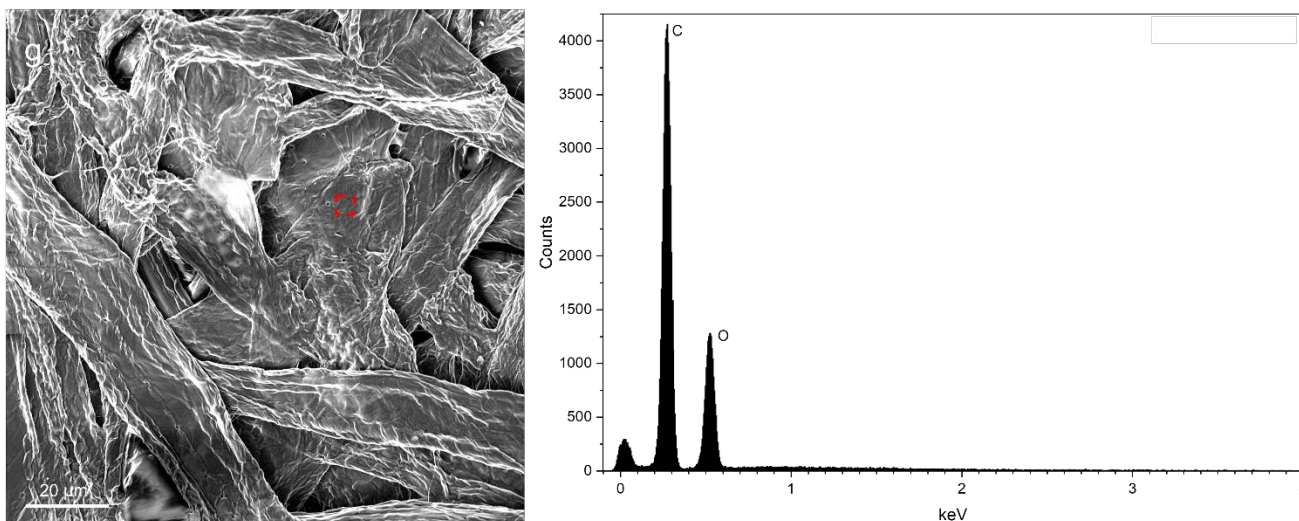

**Fig. S4** SEM-EDX analysis of bagasse B-P1-P2-C pulp sheet fibers based on six spectrum positions (highlighted in red dashed rectangle) in comparison to reference pulp cellulose fiber (**g**): **a** Spectrum 1 (primary form being aluminosilicate); **b** Spectrum 2 (calcium silicate); **c** Spectrum 3 (silicon dioxide); **d** Spectrum 4 (silicon dioxide); **e** Spectrum 5 (silicon dioxide); **f** Spectrum 6 (magnesium silicates); **g** reference (pulp cellulose fiber).

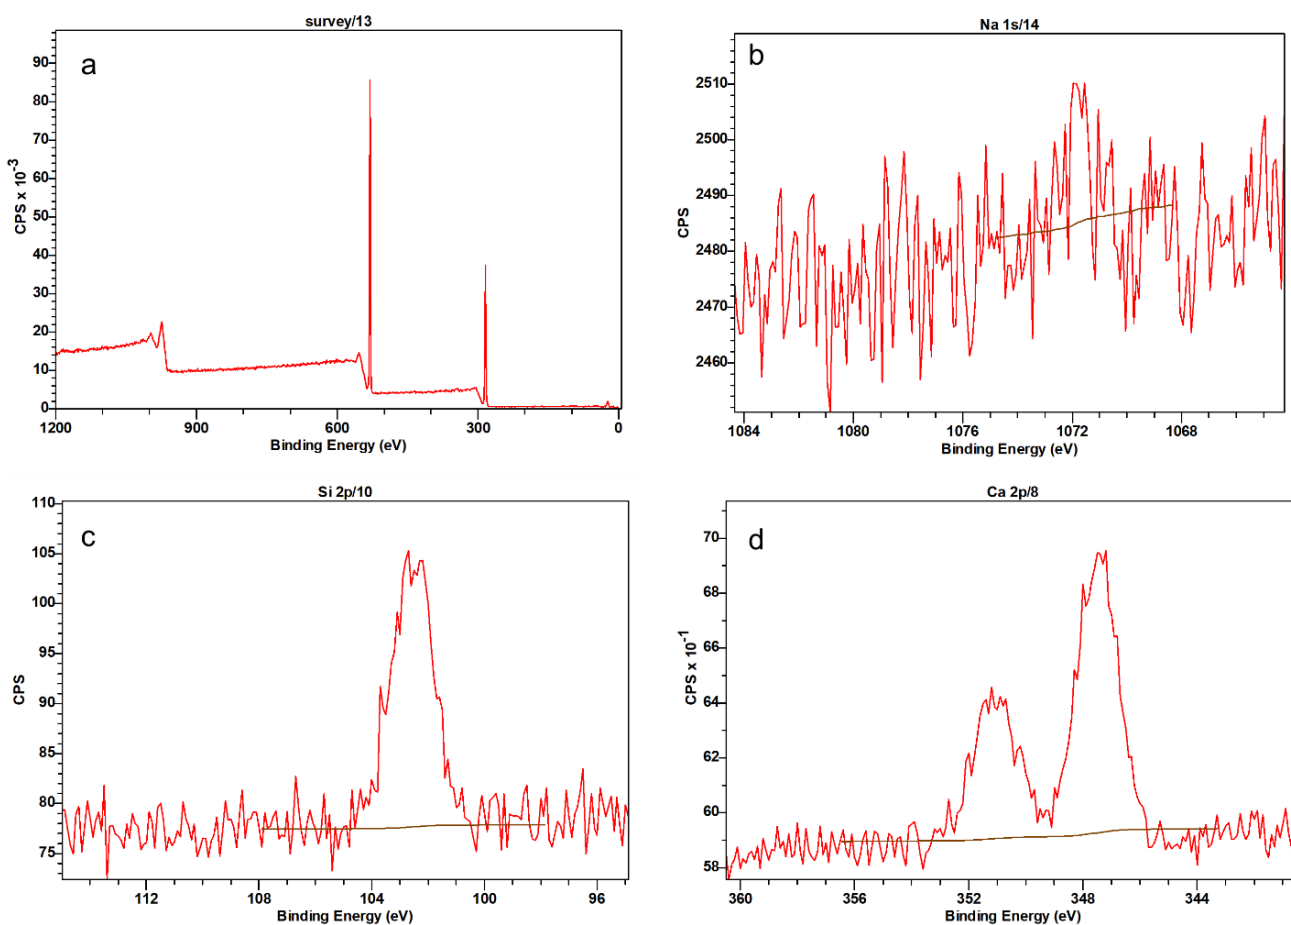

**Fig. S5** XPS spectra shows wide-range surveys scan (**a**) as well as high-resolution spectra from the Na 1s (**b**), Si 2p (**c**), and Ca 2p (**d**) regions from the sample B-P1-P2-C (post-extracted).

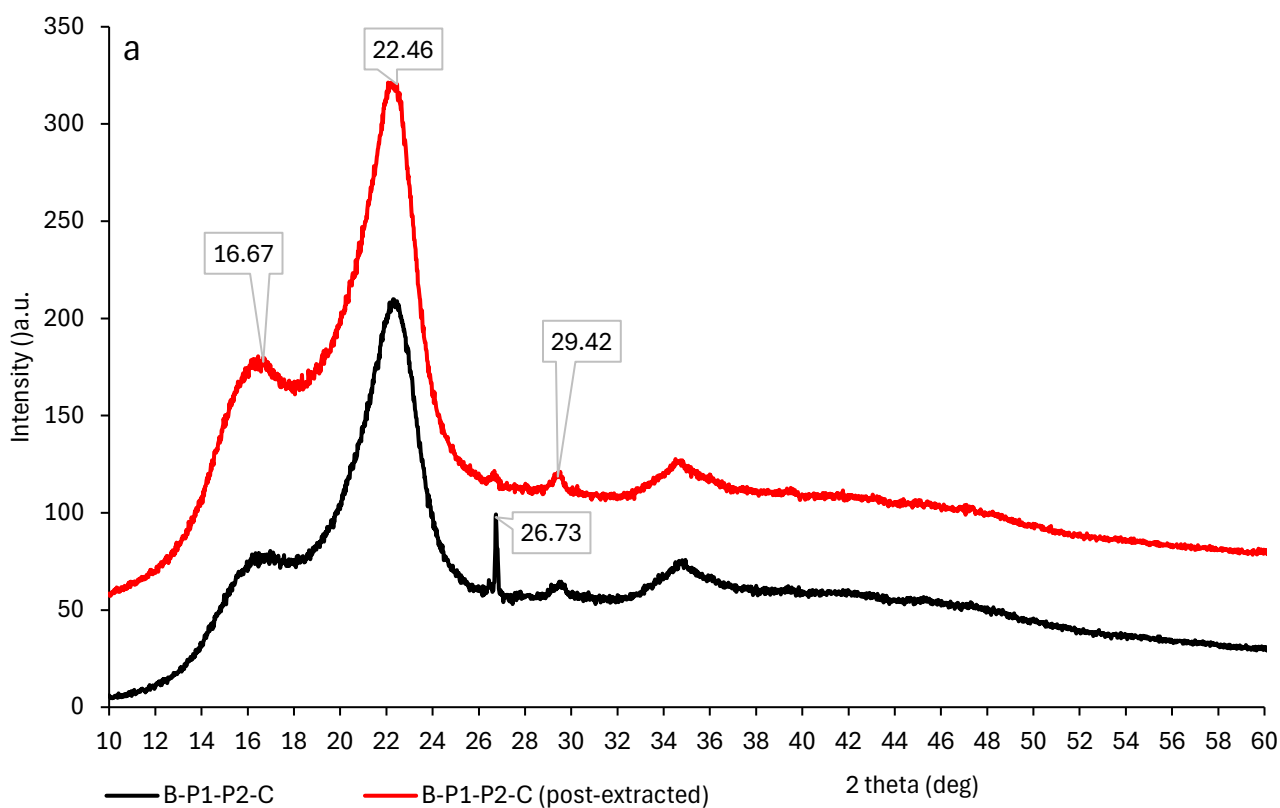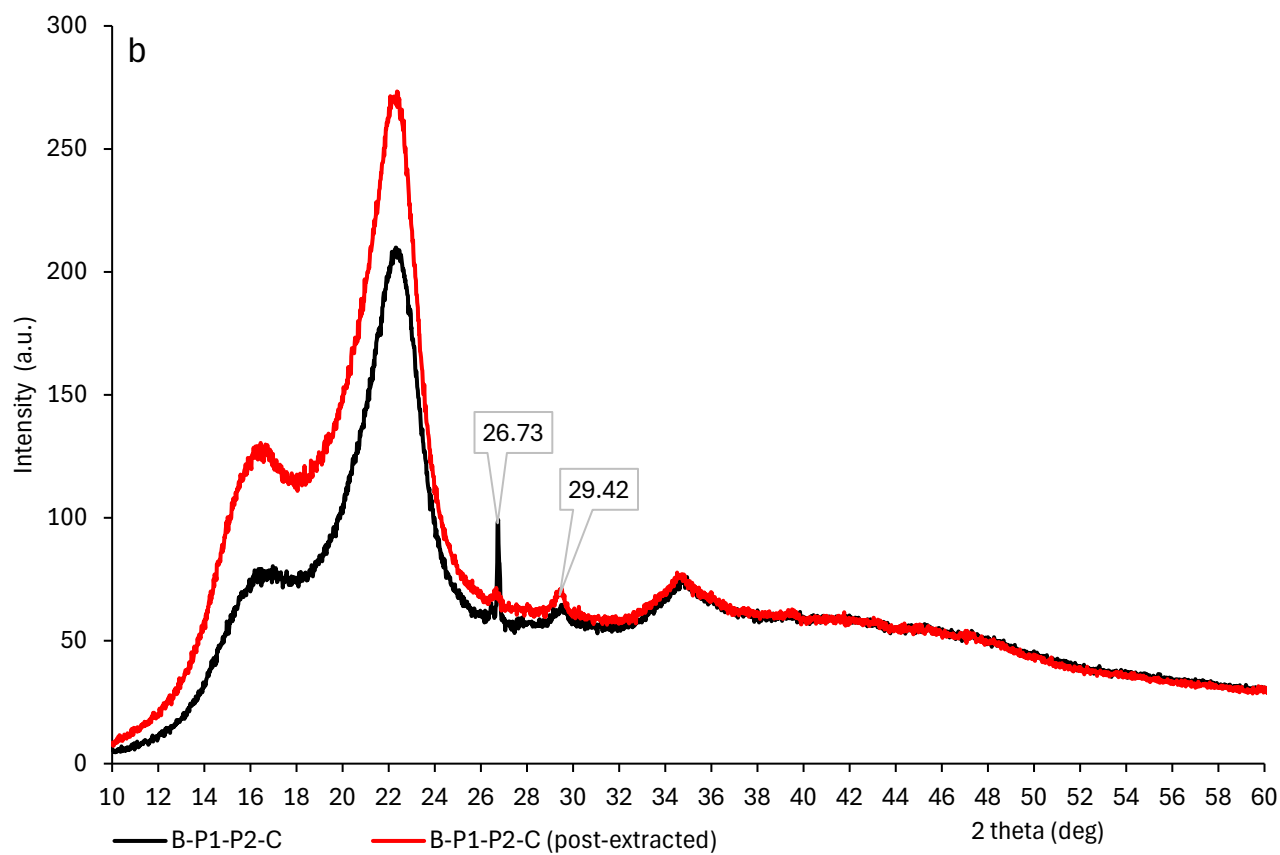

**Fig. S6** XRD patterns of B-P1-P2-C sample in comparison to its post-extracted form (B-P1-P2-C (post-extracted)) in different forms: **a** stacked plot; **b** layer by layer.

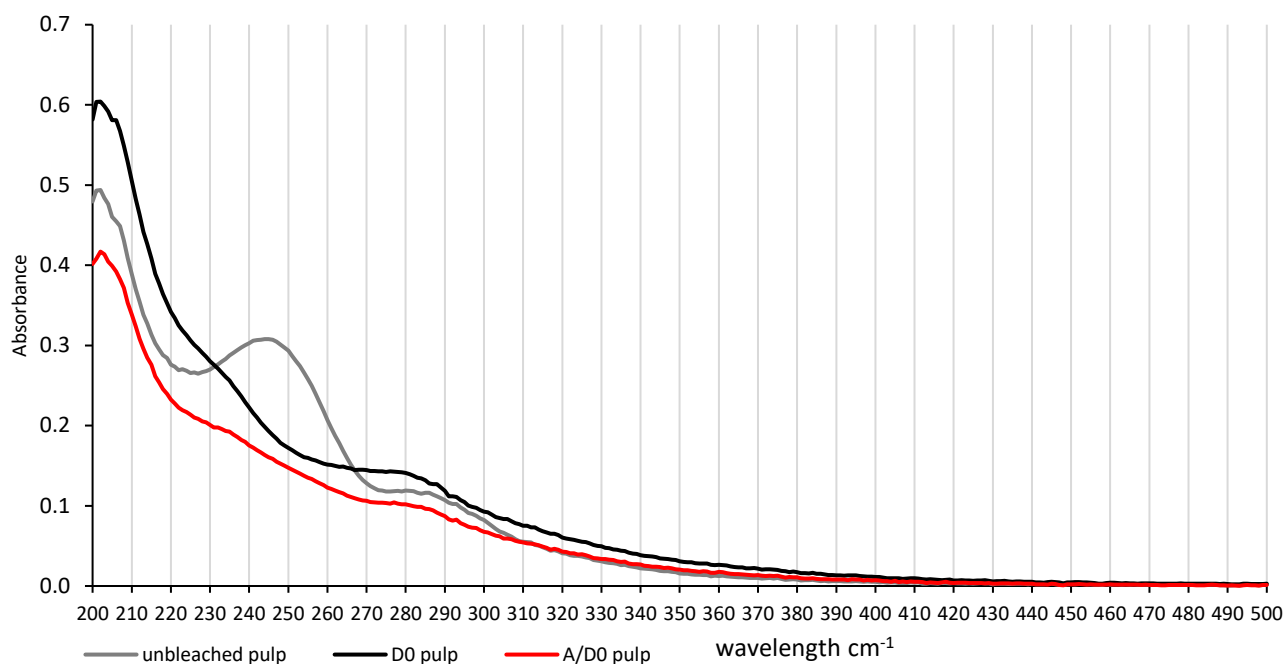

**Fig. S7** UV-vis spectrum of the acid hydrolysate from multiple sources of the pulp: 1) unbleached pulp (B-P1-P2-C); 2) D<sub>0</sub> pulp; 3) A/D<sub>0</sub> pulp. See **Table S1** for the abbreviations.

**Table S4** Preparation of GC-MS total-ion chromatogram of B-P1-P2 along with the A/D<sub>0</sub> and DO hydrolysate. Hydrolysate amount differs from 400g (B-P1-P2-1; B-P1-P2-C-A/D<sub>0</sub>-1; B-P1-P2-C-A/D<sub>0</sub>-2; B-P1-P2-C-D<sub>0</sub>-1) to 50 or 100g depending on the sample source. 2-Furonic acid (2-FA) is calculated semi-quantitatively based on the relative intensities' ratios between 2-FA/ C<sub>24</sub>.

|                            |                               | pulp,g | splatted / overall hydrolysate, g | Evaporated solid, mg | Intensity C <sub>24</sub> | Intensity 2-furonic acid (2-FA) | 2-FA/ pulp; mg/g | Average of 2-FA/ pulp; mg/g (std) |
|----------------------------|-------------------------------|--------|-----------------------------------|----------------------|---------------------------|---------------------------------|------------------|-----------------------------------|
| B-P1-P2                    | B-P1-P2-1                     | 3.7    | 400.3/1529.3                      | 28.7                 | 90881623                  | 130957470                       | 0.73             | 0.59 (0.11)                       |
|                            | B-P1-P2-2                     | 3.7    | 99.8/1529.3                       | 2.49                 | 105116411                 | 29247917                        | 0.57             |                                   |
|                            | B-P1-P2-3                     | 3.7    | 100.3/1529.3                      | 2.3                  | 105413007                 | 23626233                        | 0.46             |                                   |
|                            | B-P1-P2-4                     | 3.7    | 100.0/ 1529.3                     | 3.15                 | 109033808                 | 31342294                        | 0.59             |                                   |
| B-P1-P2-C-A/D <sub>0</sub> | B-P1-P2-C-A/D <sub>0</sub> -1 | 1.5    | 399.9/ 599.9                      | 26.3                 | 92726655                  | 29734050                        | 0.16             | 0.14 (0.04)                       |
|                            | B-P1-P2-C-A/D <sub>0</sub> -2 | 3.7    | 397.3/ 1499.4                     | 25.1                 | 95346840                  | 32218004                        | 0.17             |                                   |
|                            | B-P1-P2-C-A/D <sub>0</sub> -3 | 1.5    | 51.2/ 599.9                       | 1.29                 | 107703820                 | 5647115                         | 0.21             |                                   |
|                            | B-P1-P2-C-A/D <sub>0</sub> -4 | 3.7    | 100.4/ 1499.4                     | 3.15                 | 112709033                 | 5913800                         | 0.10             |                                   |
|                            | B-P1-P2-C-A/D <sub>0</sub> -5 | 3.7    | 100.2/ 1499.4                     | 3.21                 | 111185545                 | 6449772                         | 0.12             |                                   |
|                            | B-P1-P2-C-A/D <sub>0</sub> -6 | 3.7    | 99.9/ 1499.4                      | 3.07                 | 110449214                 | 5907132                         | 0.11             |                                   |
| B-P1-P2-C-D <sub>0</sub>   | B-P1-P2-C-D <sub>0</sub> -1   | 1.5    | 399.6/ 604.5                      | 33.6                 | 93087322                  | 14181323                        | 0.08             | 0.05 (0.02)                       |
|                            | B-P1-P2-C-D <sub>0</sub> -2   | 1.5    | 49.8/ 604.5                       | 2.15                 | 109739423                 | 1472416                         | 0.05             |                                   |
|                            | B-P1-P2-C-D <sub>0</sub> -3   | 1.5    | 49.8/ 604.5                       | 1.39                 | 112353926                 | 849316                          | 0.03             |                                   |

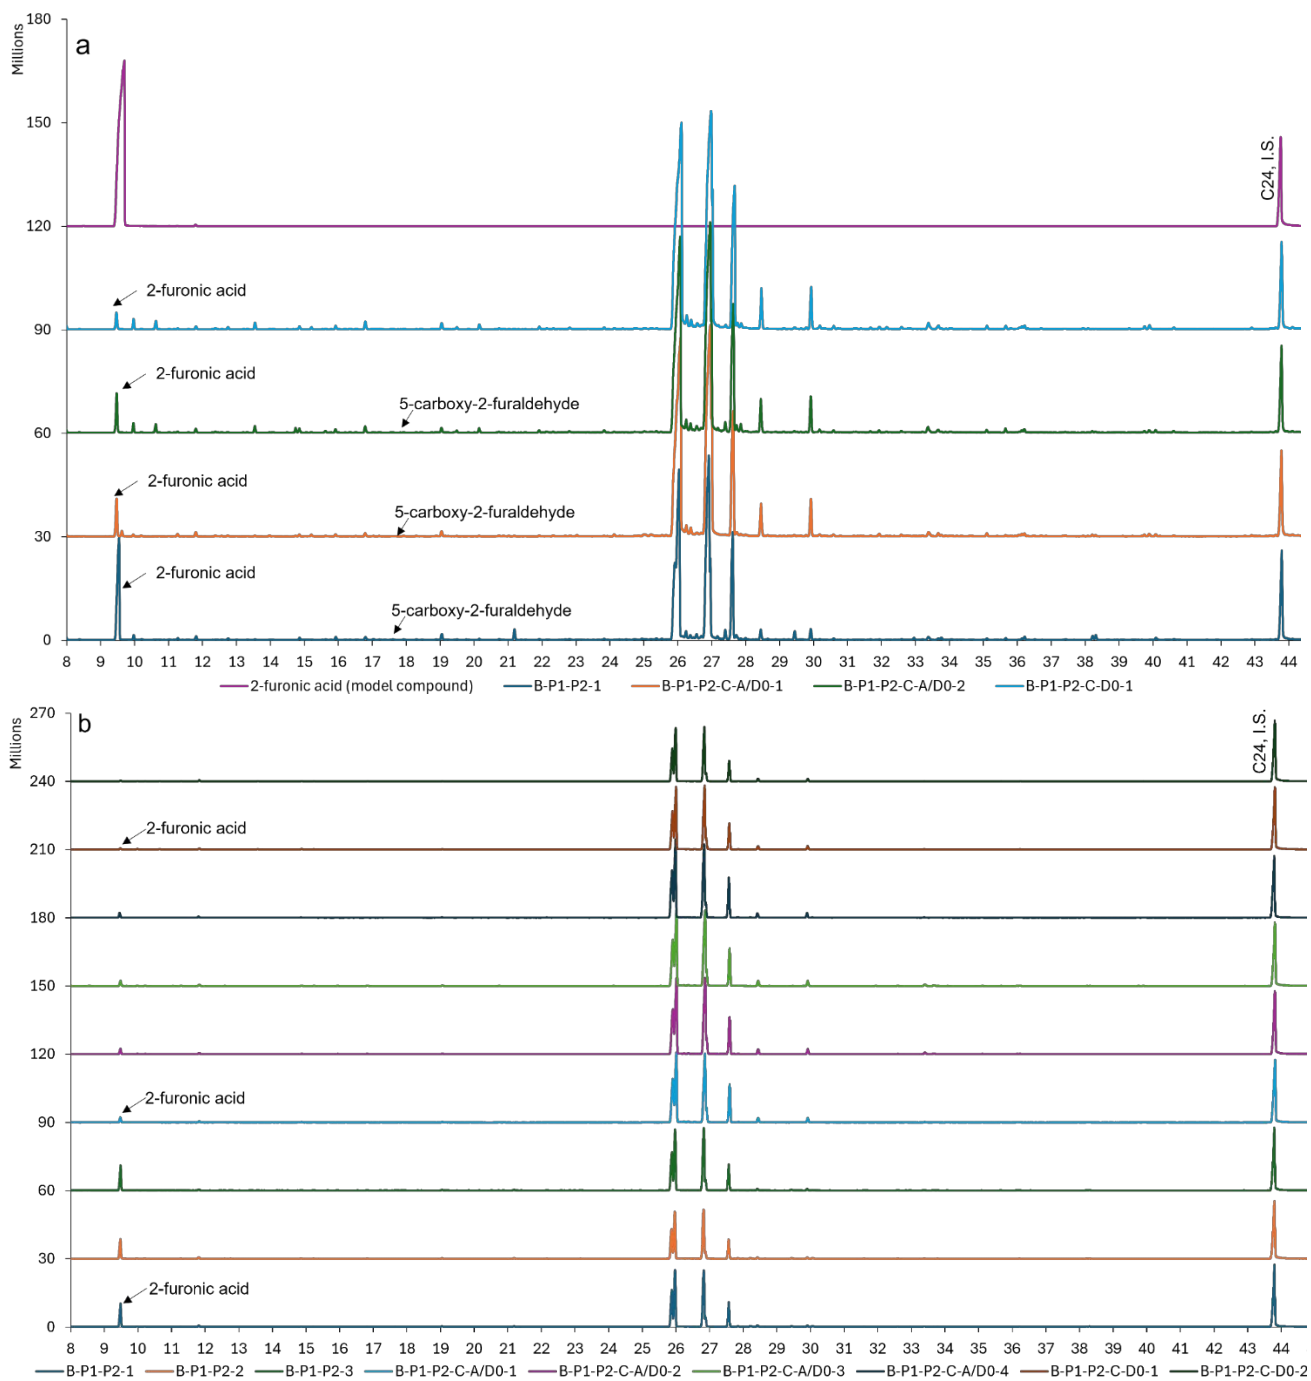

**Fig. S8** GC-MS total-ion chromatogram of B-P1-P2 along with the A-D0 and D0 hydrolysate showing major peaks for: 2-furonic acid (2-furancarboxylic acid; CAS 88-14-2), 5-formyl-2-furancarboxylic acid (5-carboxy-2-furaldehyde; CAS 13529-17-4) and internal standard (C24, i.s.): **a** hydrolysate amount being 400g; **b** hydrolysate amount being 50 or 100g.

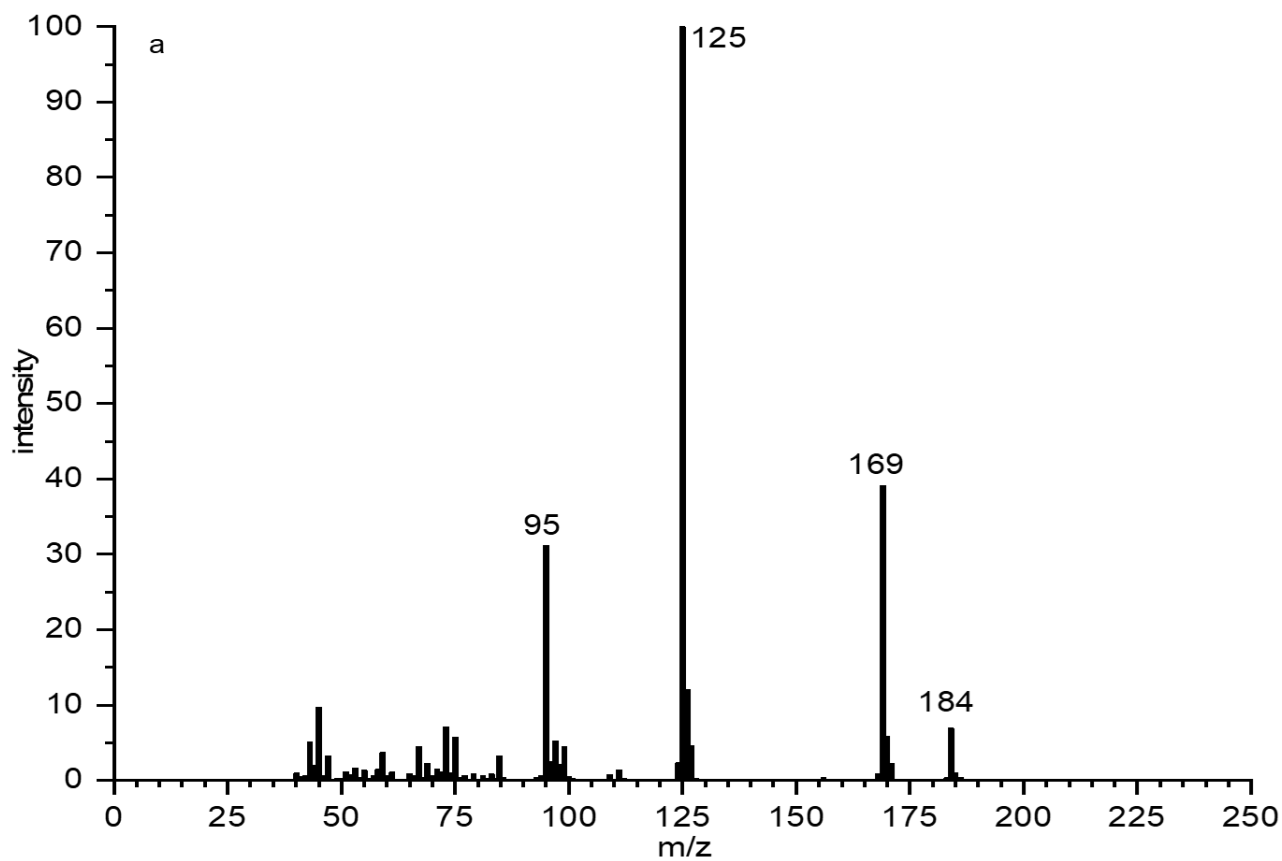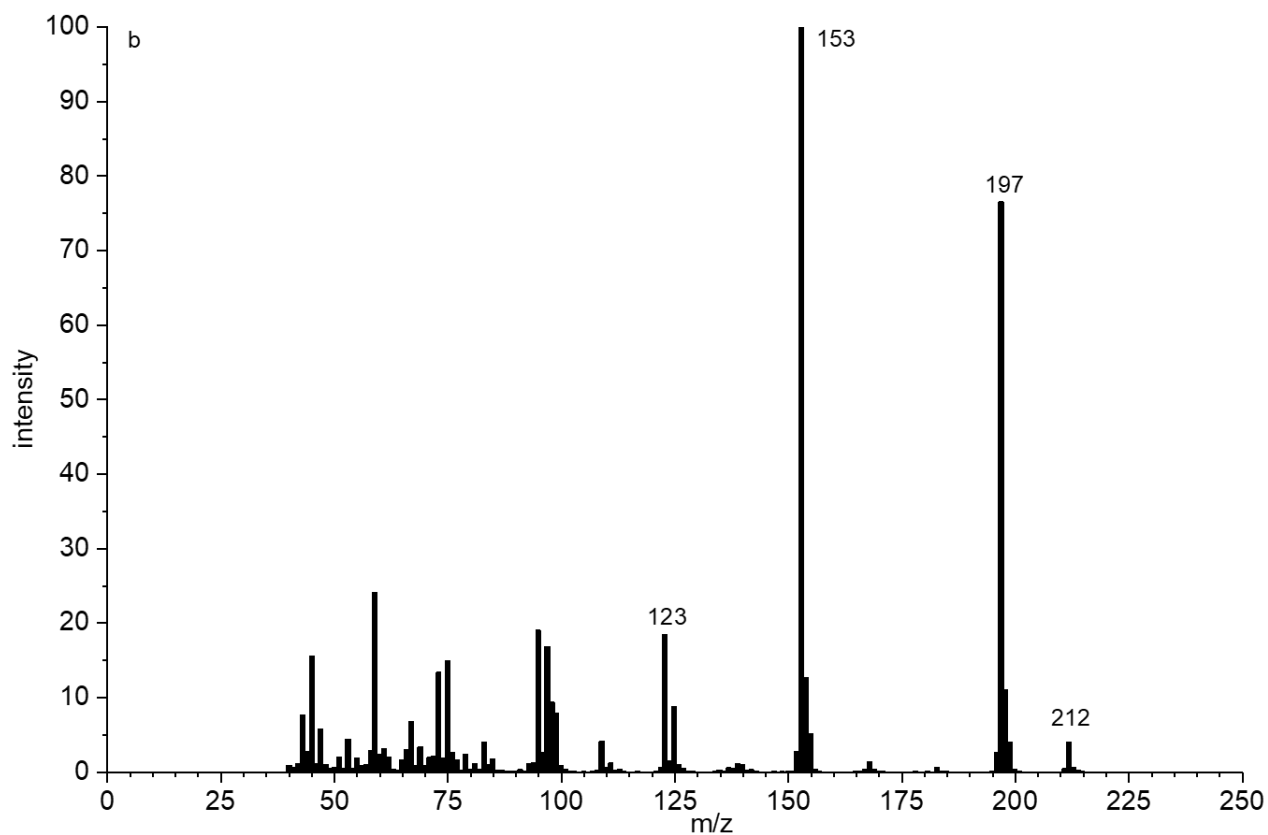

**Fig. S9** mass spectrum of the degradation products of HexA: **a** 2-furonic acid (2-furancarboxylic Acid; CAS 88-14-2); **b** 5-formyl-2-furancarboxylic acid (5-carboxy-2-furaldehyde; CAS 13529)

**Table S5** Overall chemical composition (a) and carbohydrate composition (b) (% of anhydrosugars in the original dry mass without yield consideration) from the fibrous bagasse (B, **Table S1**) to the bleached pulp.

**a**

|                                                  | Sugar       | Lignin       | Extractives |
|--------------------------------------------------|-------------|--------------|-------------|
| B                                                | 56.5 (1.1)  | 25.78 (0.2)  | 0.26        |
| B-P1                                             | 47.4 (0.9)  | 23.84 (0.6)  | 0.09        |
| B-P1-P2                                          | 71.58 (1.3) | 22.62 (0.3)  | 0.20        |
| B-P1-P2-C                                        | 94.82 (0.7) | 1.40 (0.1)   | 0.13        |
| A/D <sub>0</sub>                                 | 95.95 (0.7) | 0.97 (0.01)  | 0.13        |
| A/D <sub>0</sub> -E <sub>p</sub>                 | 95.57 (1.2) | 0.95 (0.1)   | 0.06        |
| A/D <sub>0</sub> -E <sub>p</sub> -D <sub>1</sub> | 95.79 (0.8) | 0.86 (0.03)  | 0.08        |
| D <sub>0</sub>                                   | 96.20 (0.9) | 1.05 (0.1)   | 0.13        |
| D <sub>0</sub> -E <sub>p</sub>                   | 91.50 (0.9) | 1.05 (0.005) | 0.11        |
| D <sub>0</sub> -E <sub>p</sub> -D <sub>1</sub>   | 92.25 (0.1) | 0.88 (0.1)   | 0.06        |

**b**

|                                                  | Ara        | Rha | Gal       | Glc        | Xyl        | Man |
|--------------------------------------------------|------------|-----|-----------|------------|------------|-----|
| B                                                | 1.9 (0.2)  | 0   | 0.5 (0.1) | 34.8 (0.2) | 19.4 (0.2) | 0   |
| B-P1                                             | 1.7 (0.1)  | 0   | 0.5 (0.1) | 39.5 (0.4) | 21.6 (0.6) | 0   |
| B-P1-P2                                          | 2.0 (0.2)  | 0   | 0.4 (0.1) | 45.0 (0.4) | 24.2 (0.6) | 0   |
| B-P1-P2-C                                        | 1.6 (0.1)  | 0   | 0         | 68.8 (0.5) | 24.5 (0.6) | 0   |
| A/D <sub>0</sub>                                 | 1.1 (0.01) | 0   | 0         | 70.3 (0.9) | 24.6 (0.2) | 0   |
| A/D <sub>0</sub> -E <sub>p</sub>                 | 1.1 (0.1)  | 0   | 0         | 70.9 (0.3) | 23.6 (0.3) | 0   |
| A/D <sub>0</sub> -E <sub>p</sub> -D <sub>1</sub> | 0.4 (0.2)  | 0   | 0         | 71.6 (0.5) | 23.9 (0.5) | 0   |
| D <sub>0</sub>                                   | 1.5 (0.1)  | 0   | 0         | 70.1 (0.7) | 24.7 (0.2) | 0   |
| D <sub>0</sub> -E <sub>p</sub>                   | 1.4 (0.1)  | 0   | 0         | 66.3 (0.8) | 23.9 (0.1) | 0   |
| D <sub>0</sub> -E <sub>p</sub> -D <sub>1</sub>   | 0.6 (0.1)  | 0   | 0         | 67.5 (0.6) | 24.2 (0.3) | 0   |

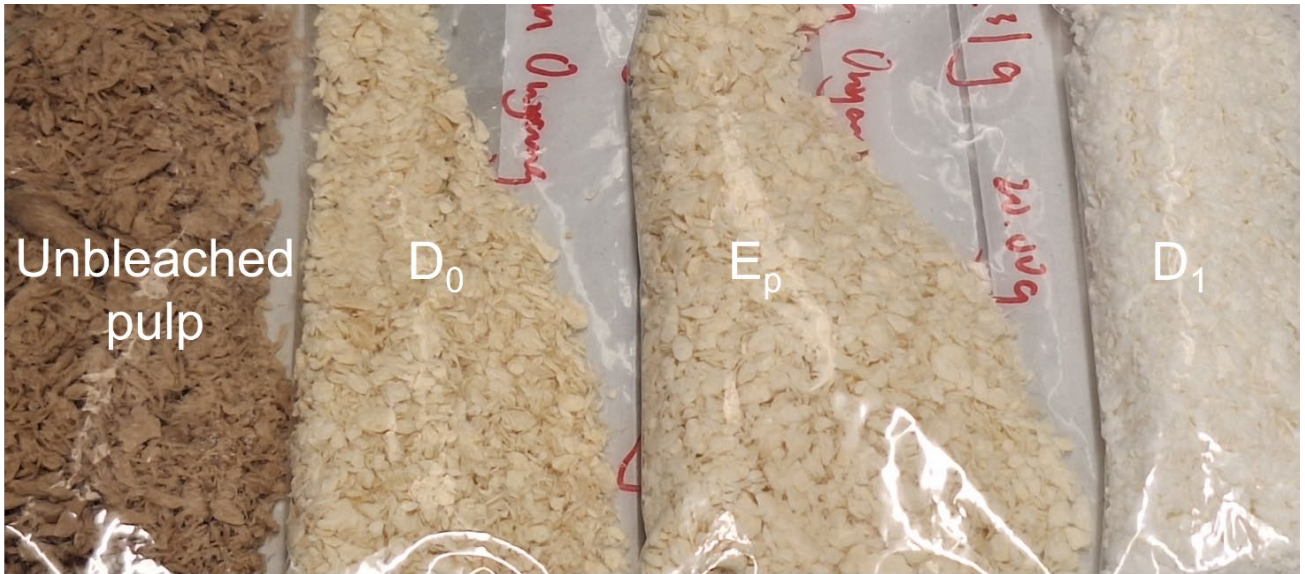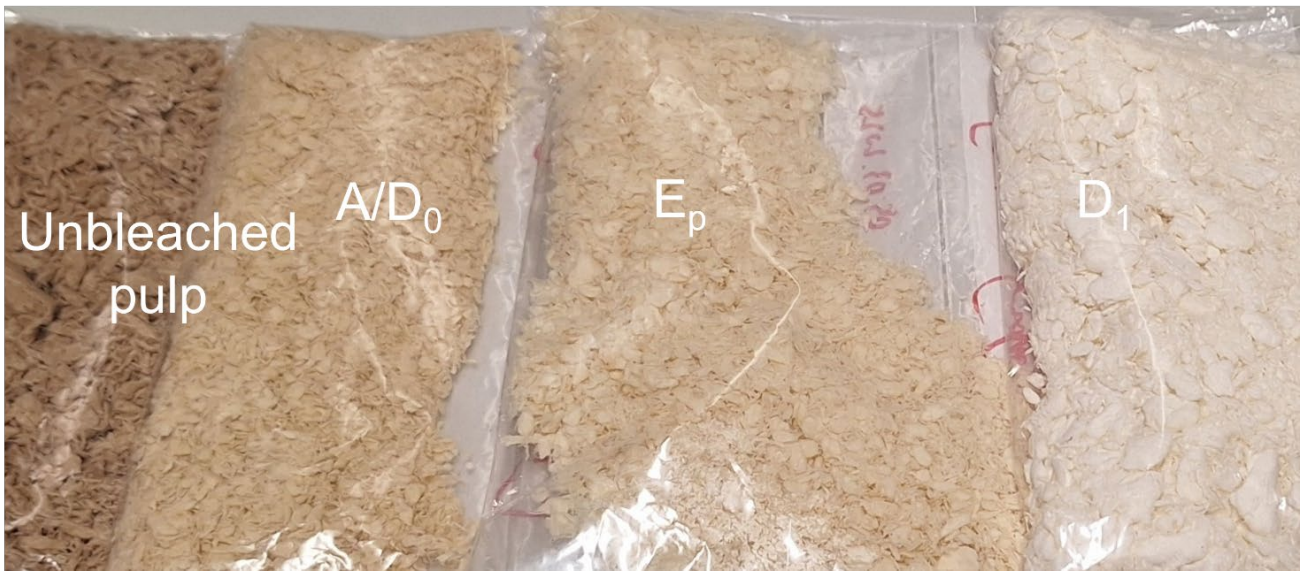

Fig. S10 Photograph of the pulp comparison between the D<sub>0</sub>-E<sub>p</sub>-D<sub>1</sub> and A/D<sub>0</sub>-E<sub>p</sub>-D<sub>1</sub>.

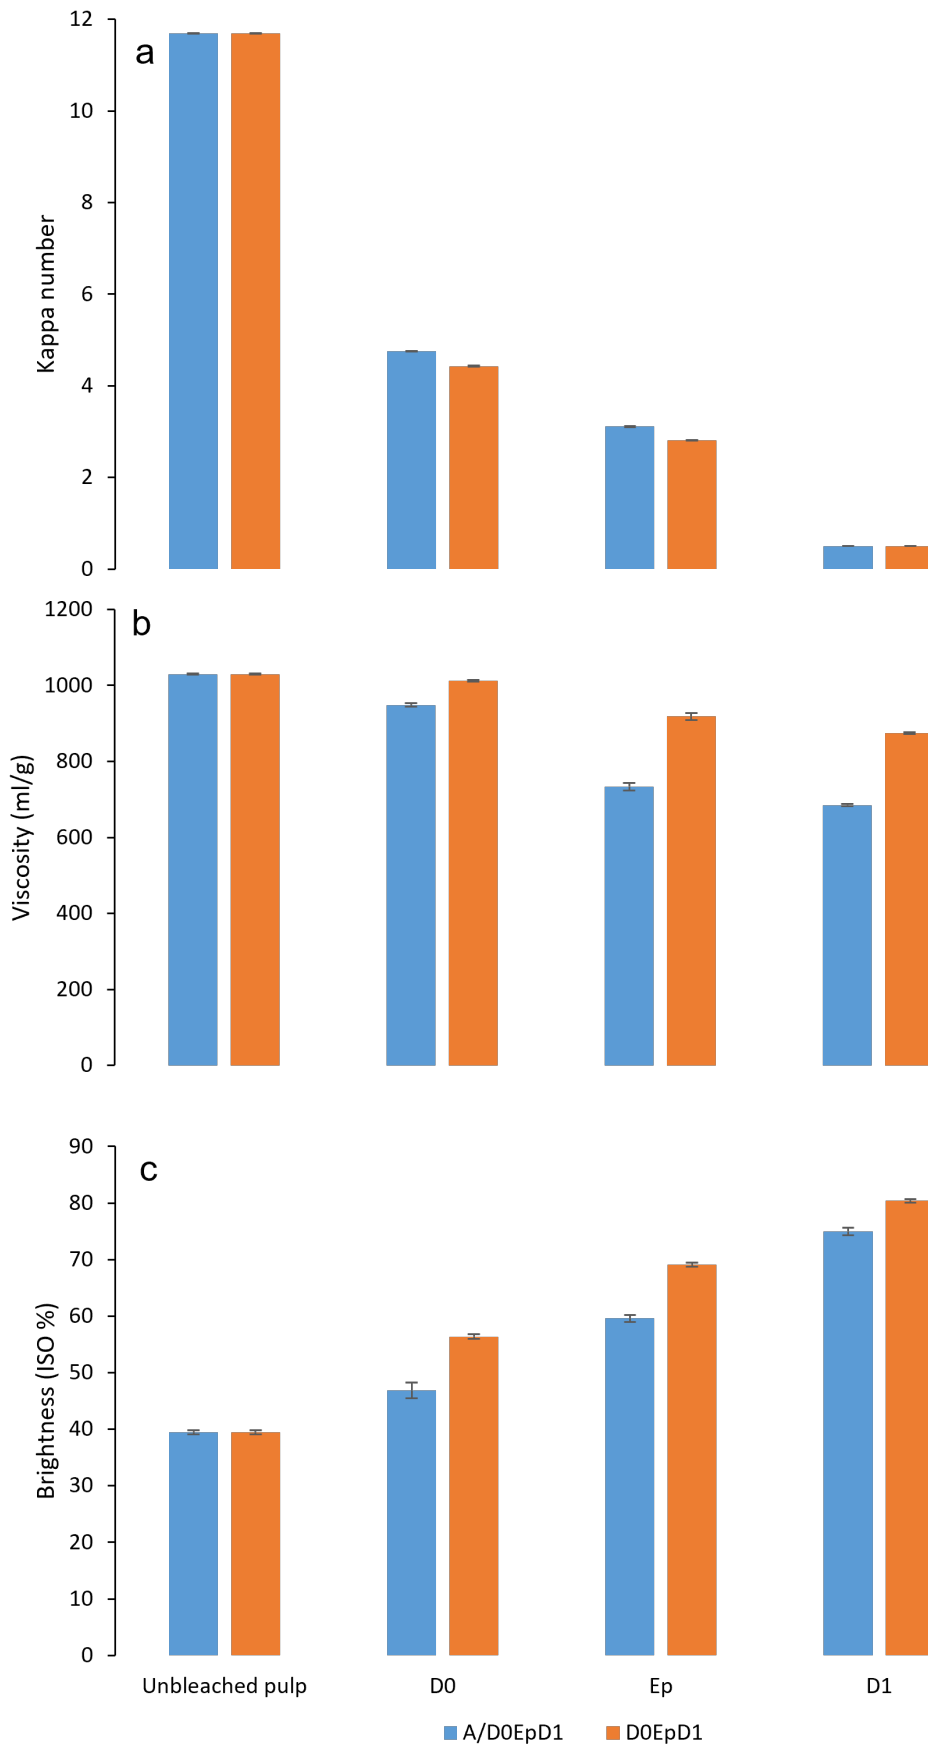

**Fig. S11** Pulps' properties of bagasse delignified pulp treated with A/D<sub>0</sub>EpD<sub>1</sub> (5.2 %Act. Cl), in comparison to D<sub>0</sub>EpD<sub>1</sub> (4%Act. Cl): **a** Kappa; **b** Viscosity; **c** ISO brightness.

**Table S6** Their exact datapoints and basic profile properties of the paper sheets (optical properties). Standard deviations are included as part of parenthesis.

|                      | Tensile properties      |                        |                      | Profile of sheet |                              |                       |                               |
|----------------------|-------------------------|------------------------|----------------------|------------------|------------------------------|-----------------------|-------------------------------|
|                      | Tensile strength (kN/m) | Young 's Modulus (Gpa) | Tensile index (Nm/g) | Thickness (mm)   | Density (kg/m <sup>3</sup> ) | Mass of one sheet (g) | Grammage (g/ m <sup>2</sup> ) |
| B-P1-P2-C            | 7.999 (0.341)           | 1.814 (0.135)          | 41.924 (1.788)       | 0.305 (0.021)    | 625.6                        | 0.1431                | 190.8                         |
| D0                   | 7.512 (0.205)           | 1.592 (0.122)          | 28.88 (0.788)        | 0.408 (0.106)    | 637.5                        | 0.1951                | 260.1                         |
| A/D0                 | 7.874 (0.272)           | 1.681 (0.073)          | 27.559 (0.952)       | 0.381 (0.071)    | 749.8                        | 0.2143                | 285.7                         |
| D0-Ep-D1 (sheet 1)   | 9.586 (0.415)           | 1.882 (0.07)           | 32.538 (1.407)       | 0.425 (0.049)    | 693.1                        | 0.2209                | 294.6                         |
| D0-Ep-D1 (sheet 2)   | 9.225 (0.369)           | 1.594 (0.125)          | 28.359 (1.134)       | 0.432 (0.059)    | 753.1                        | 0.2440                | 325.3                         |
| A/D0-Ep-D1 (sheet 1) | 9.225 (0.765)           | 1.739 (0.044)          | 26.321 (2.183)       | 0.471 (0.083)    | 744.1                        | 0.2629                | 350.5                         |
| A/D0-Ep-D1 (sheet 2) | 7.498 (1.1)             | 1.89 (0.332)           | 26.912 (3.948)       | 0.367 (0.047)    | 759.2                        | 0.2090                | 278.6                         |

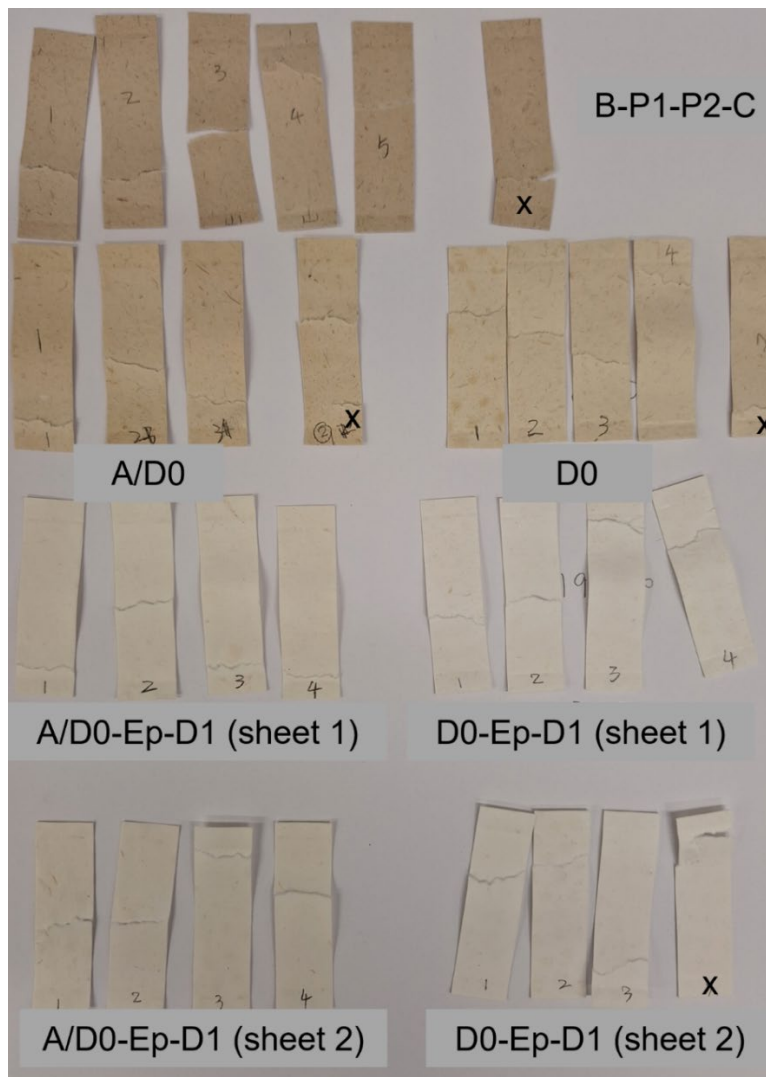

**Fig. S12** Photograph of the fracture surface of laboratory paper sheets (optical properties) after the tensile test.

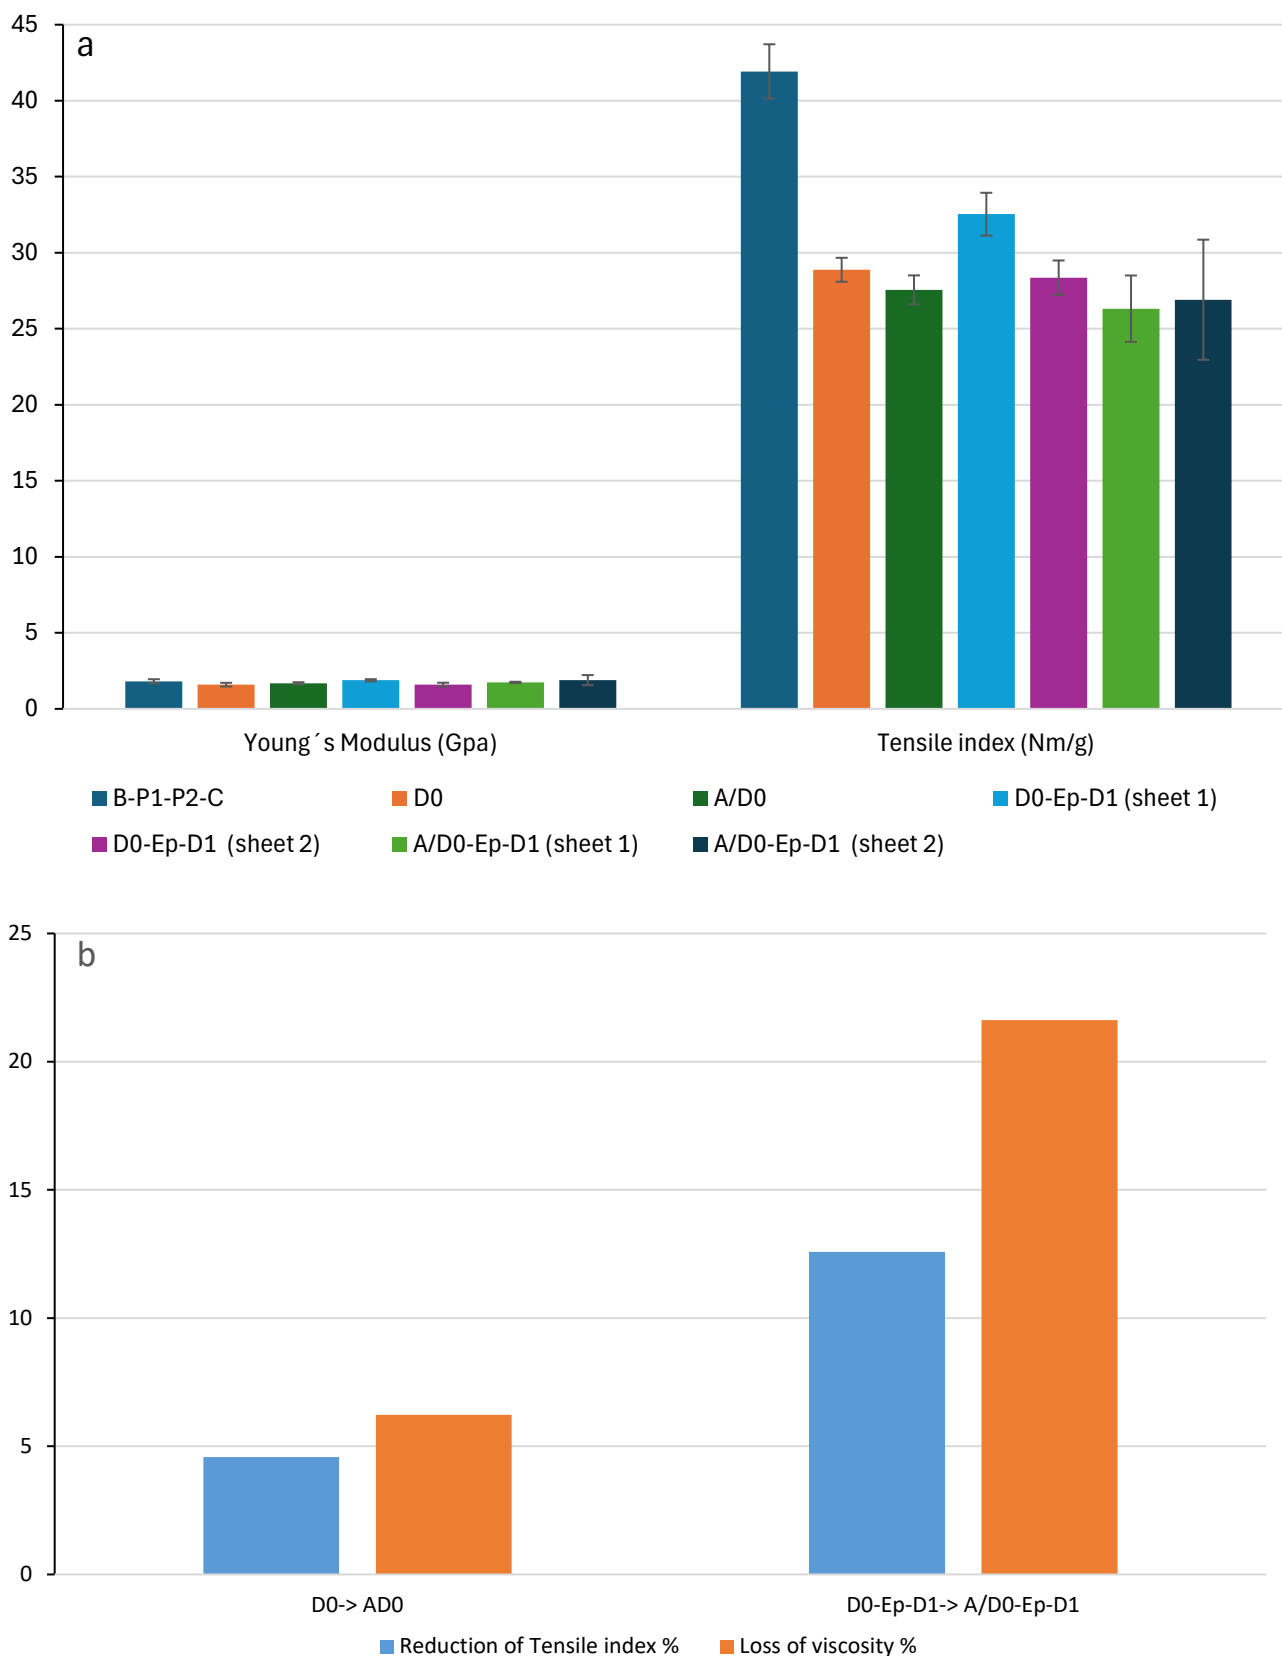

**Fig. S13** Tensile properties showing the effect of A-stage in reference to B-P1-P2-C: **a** D0 in comparison to A/D0; D0EpD1 in comparison to A/D0EpD1. Their exact data points and profile properties, as well as their breakage fracture of the pulp sheet, are shown at **Table S6** and **Fig. S12**. **b** Correlation between the loss of viscosity and reduction of tensile index from two series of sample: D0-> A/D0 and D0-Ep-D1-> A/D0-Ep-D1.

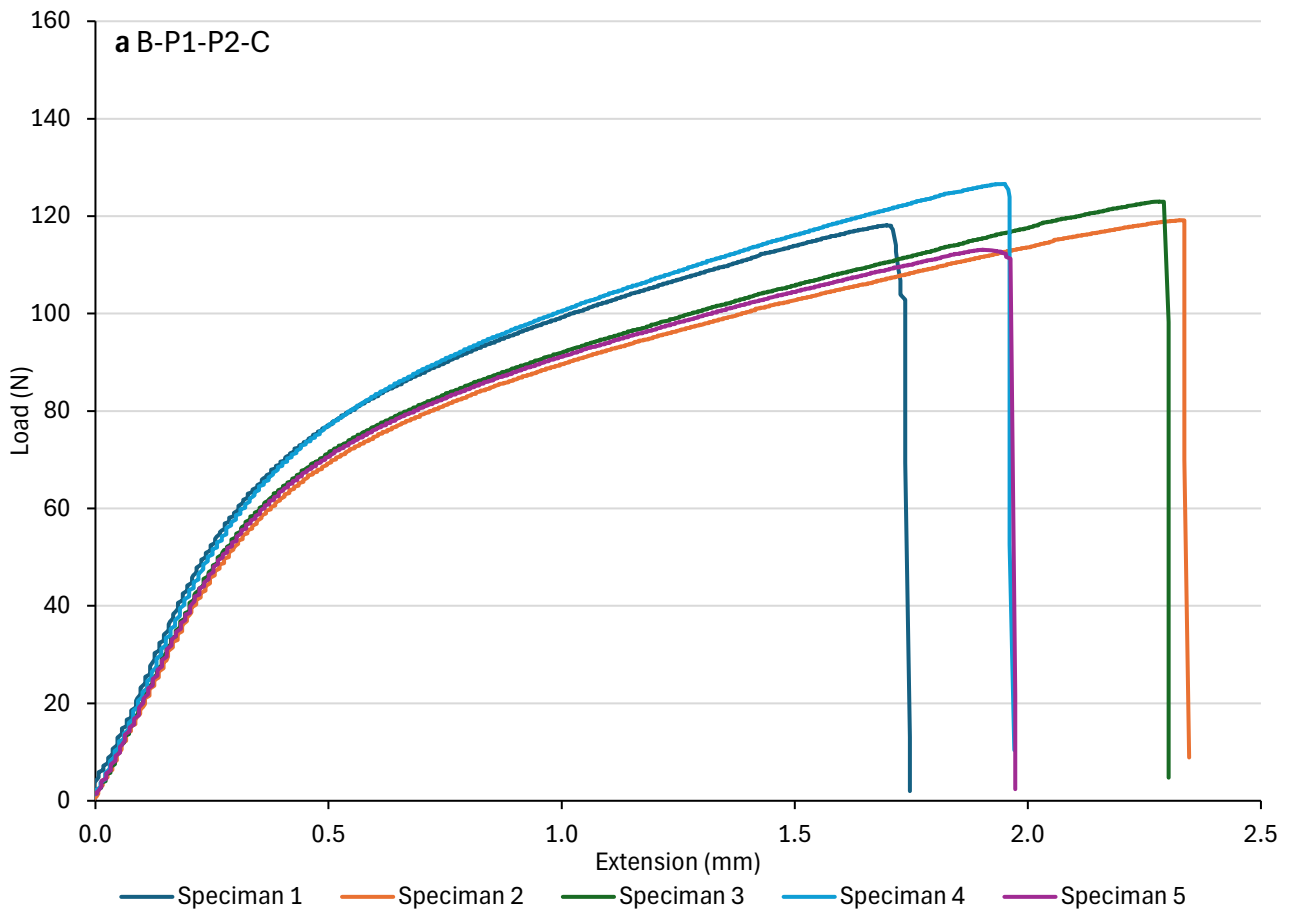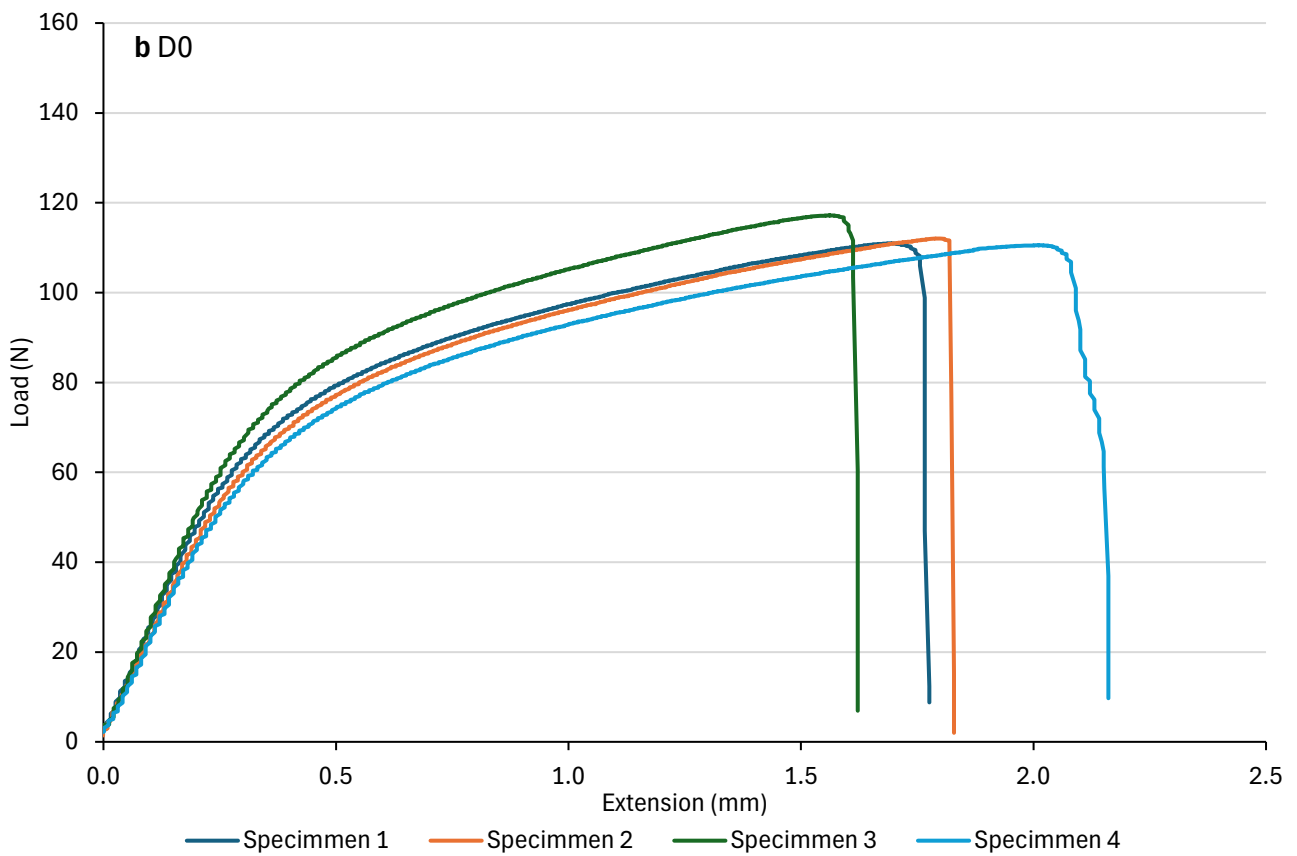

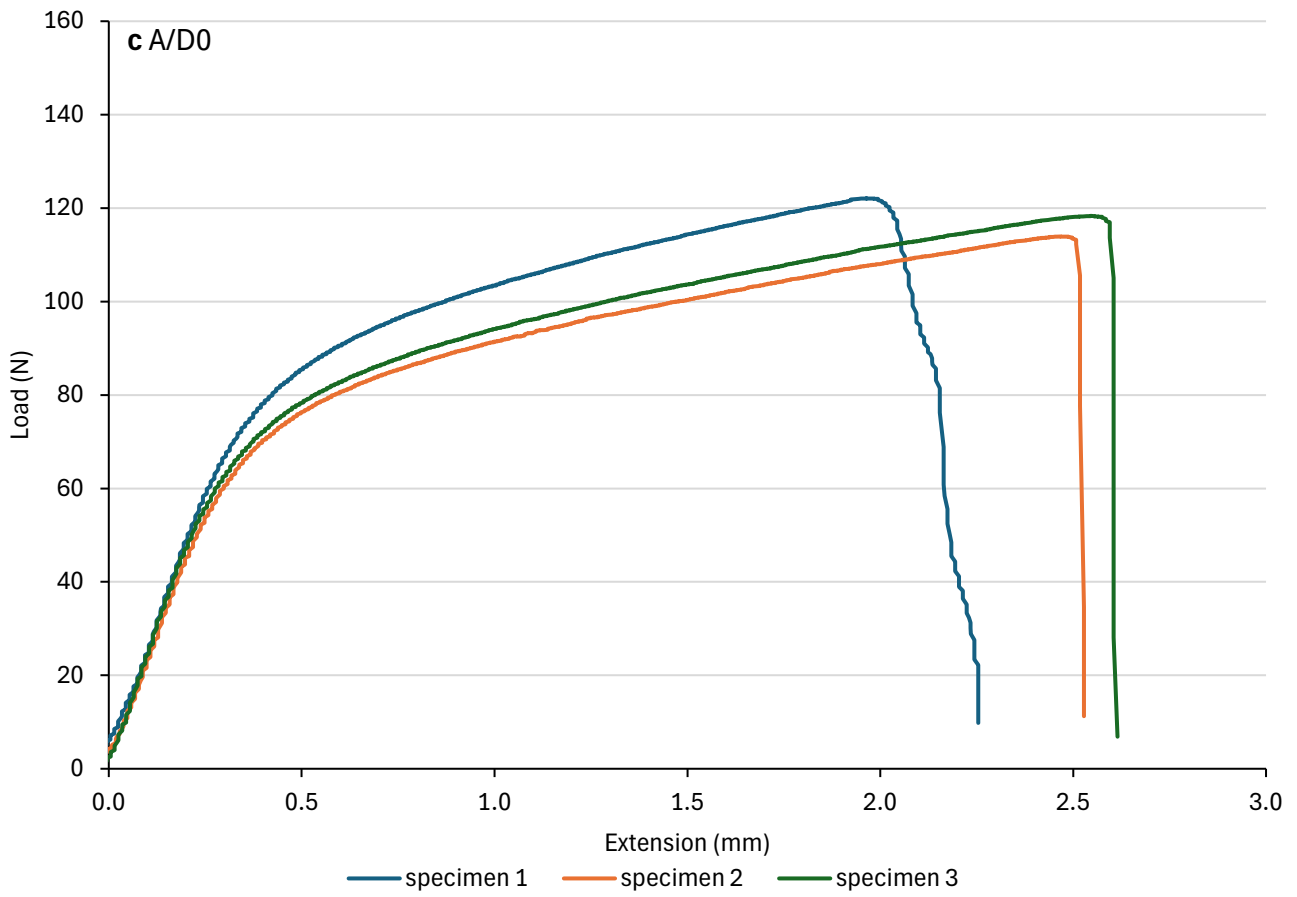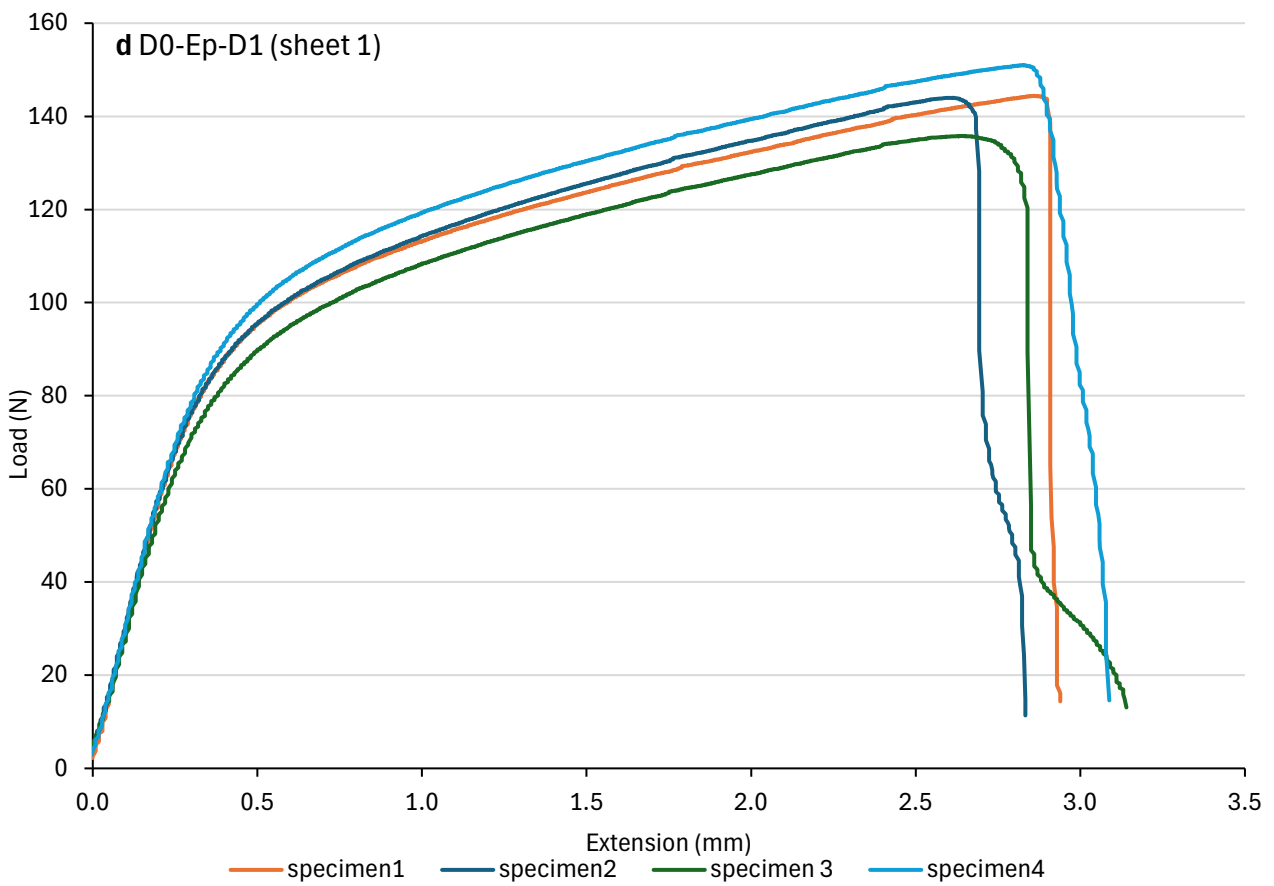

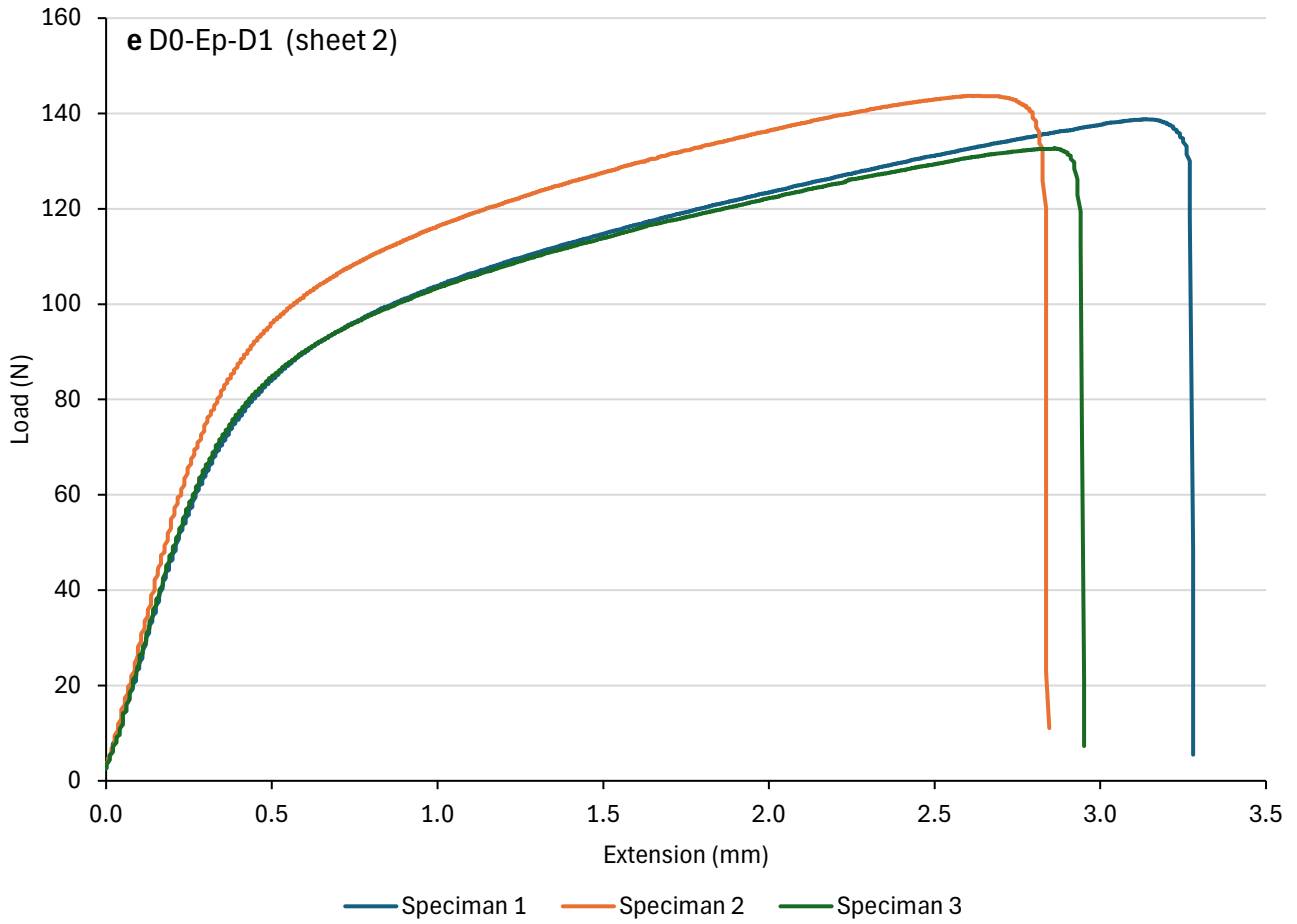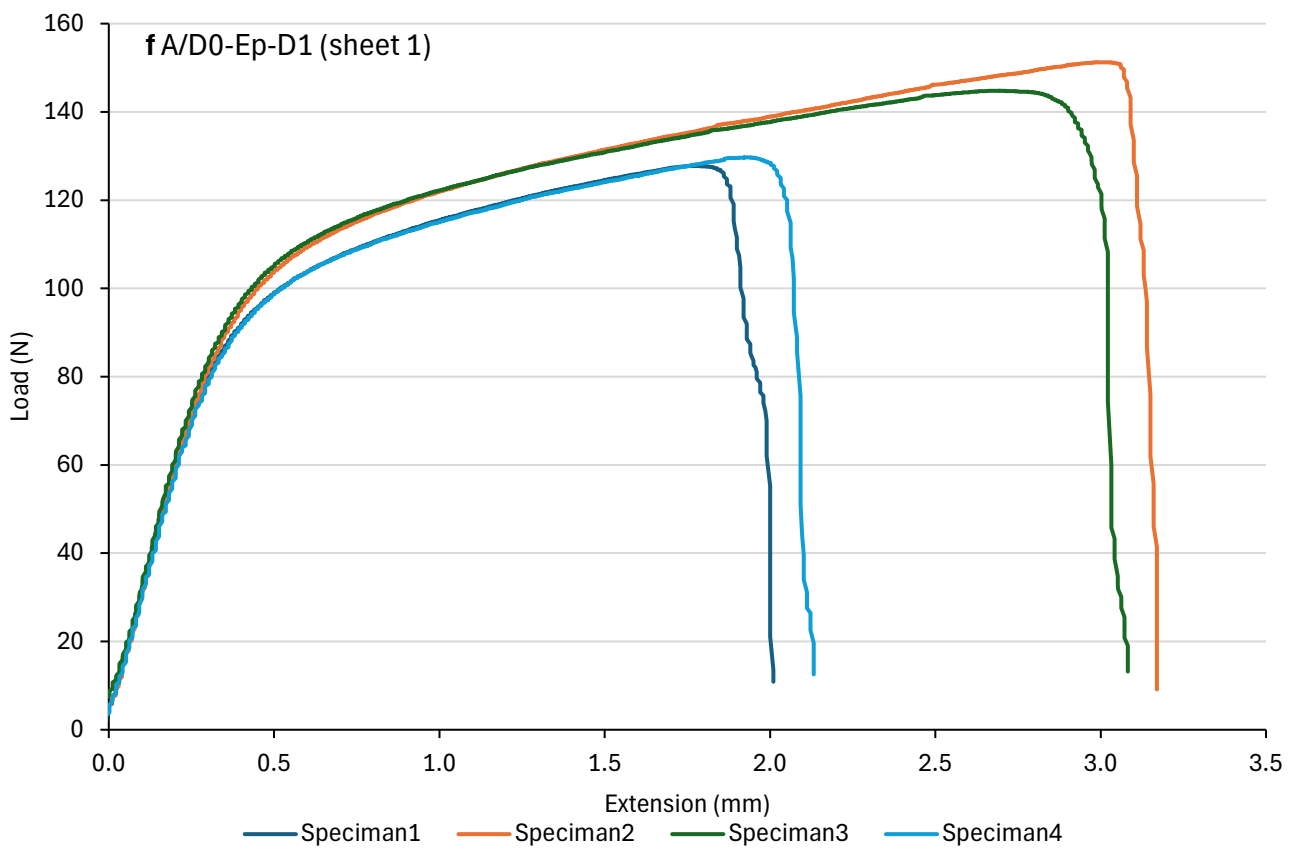

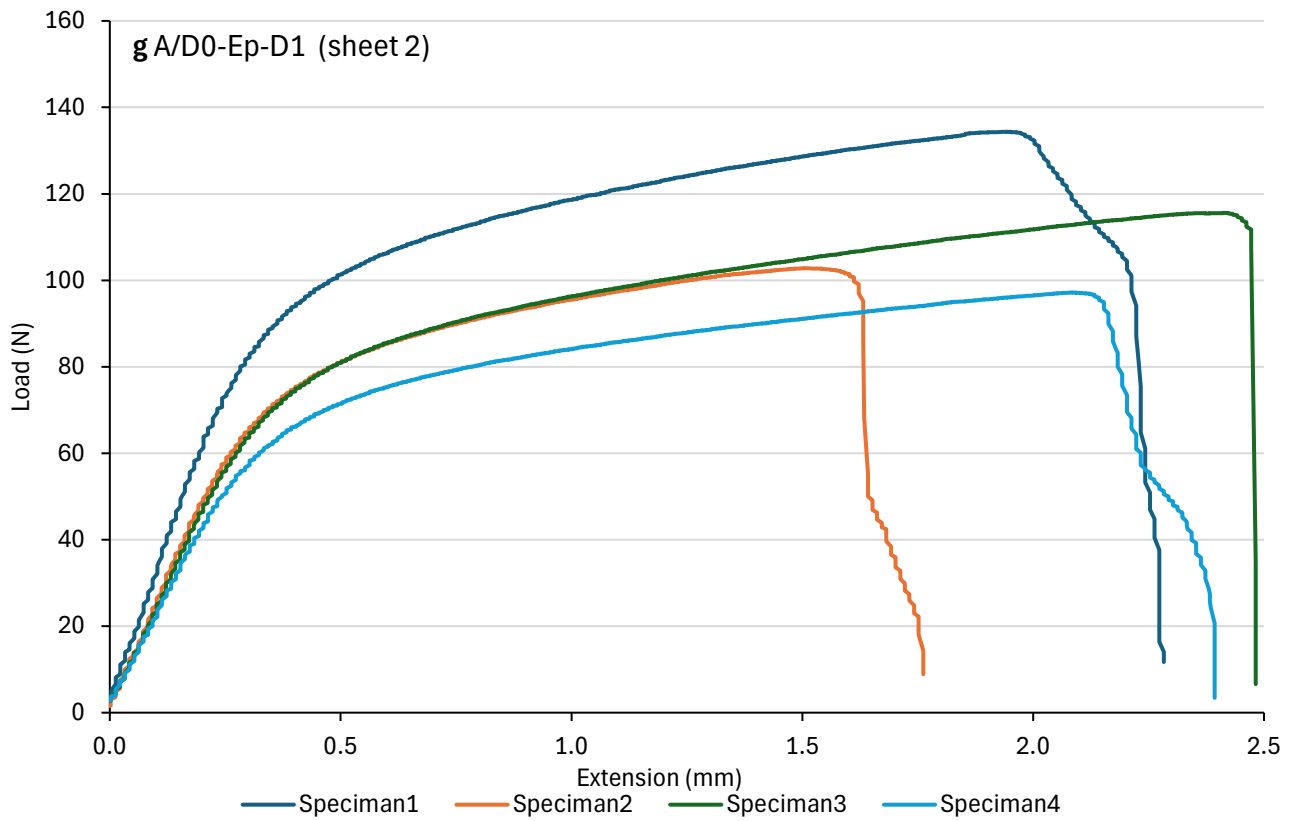

**Fig. S14** Load-Extension Curve showing the effect of A-stage in reference to B-P1-P2-C (a): **b** D0; **c** A/D0; **d** and **e** D0EpD1; **f** and **g** A/D0EpD1. **Fig. S12** visualizes photographs of their fracture surface after the tensile test.

**Table S7** Characteristics of the different lignin sources derived from the ultrafiltration (i.e. spent liquor; permeate; and retentate)

|                         |                           | Spent liquor (feed) | Permeate | Retentate |
|-------------------------|---------------------------|---------------------|----------|-----------|
| Molecular weight, g/mol | <i>M<sub>n</sub></i>      | 641                 | 487      | 980       |
|                         | <i>M<sub>w</sub></i>      | 2776                | 839.5    | 4032      |
|                         | <i>M<sub>z</sub></i>      | 8525                | 1395     | 9851      |
|                         | PD                        | 4.3                 | 1.7      | 4.1       |
| Other characteristics   | Density                   | 1.03                | 0.96     | 0.98      |
|                         | pH                        | 11.44               | 11.11    | 10.5      |
|                         | Residual alkali, g NaOH/L | 1.97                | < 0.5    | < 0.5     |

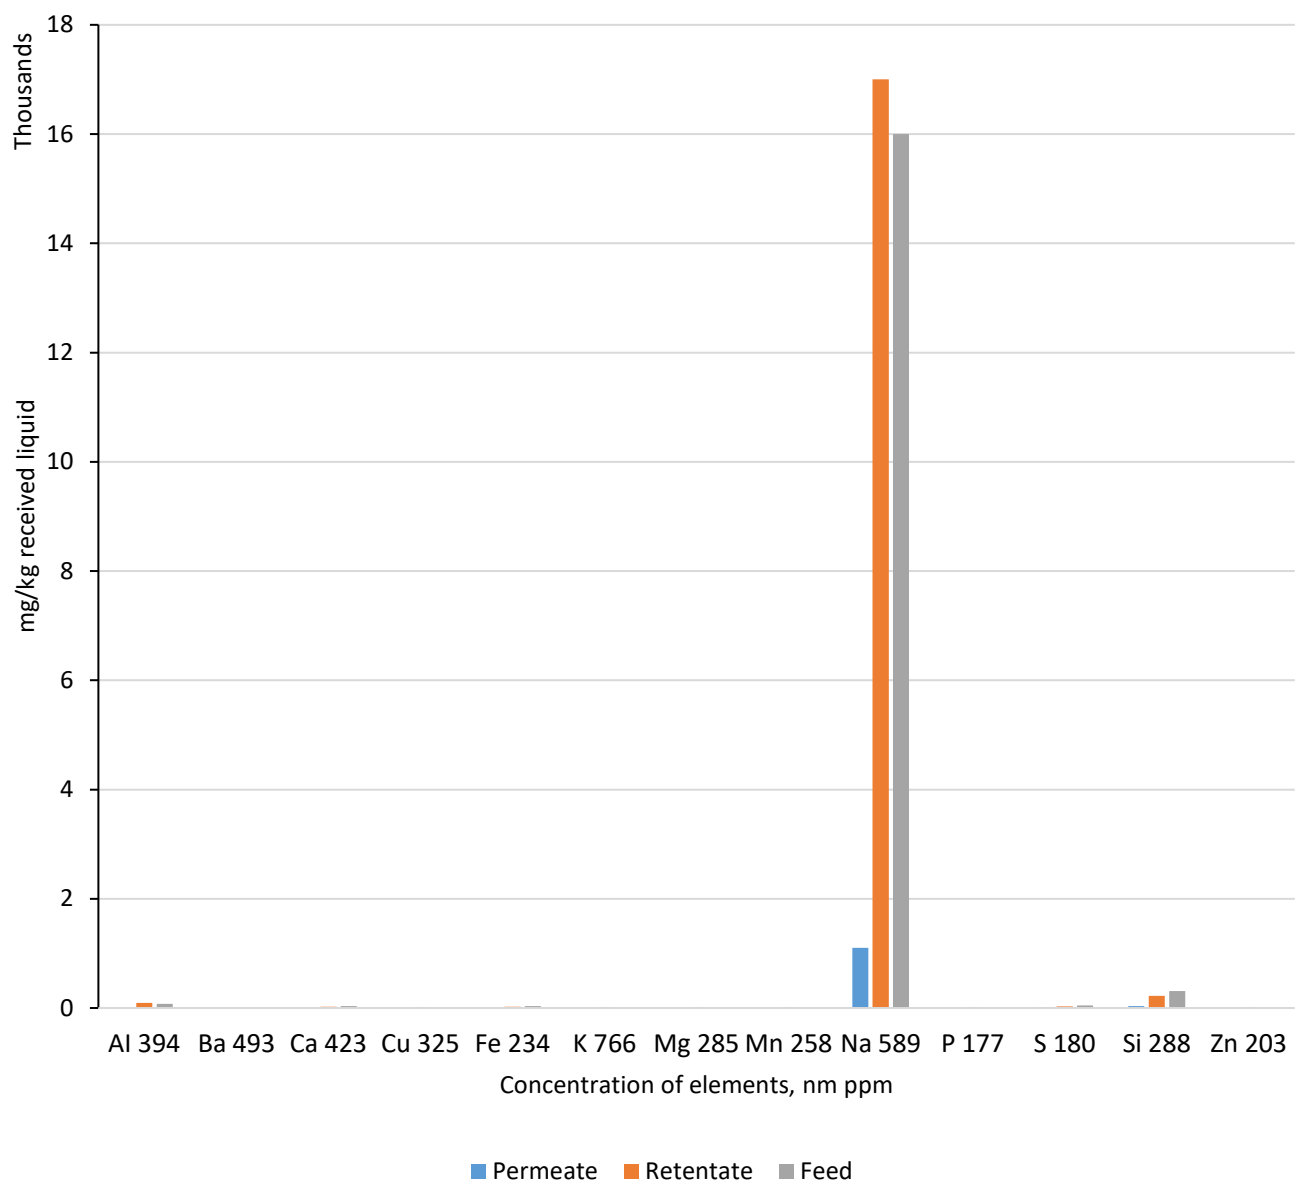

**Fig. S15** ICP-OES results of the ultrafiltration related liquids: feed; permeate; retentate.

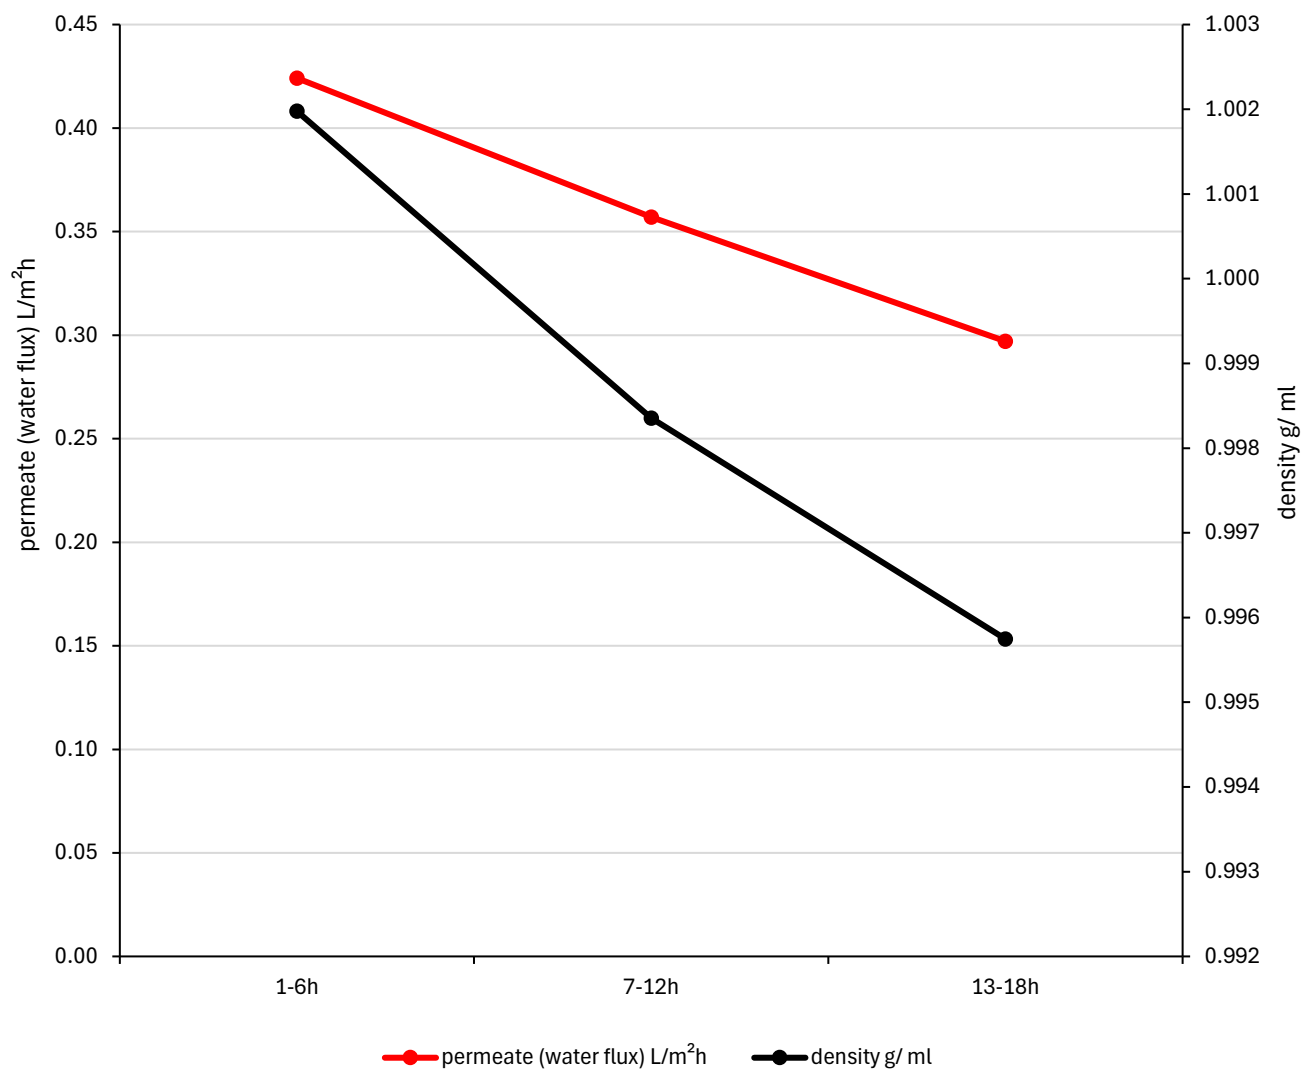

**Fig. S16** Trendline of the permeate and density along with three cycles (6 hours/ cycle) of sample collection: 1-6h; 7-12h; 13-18h.

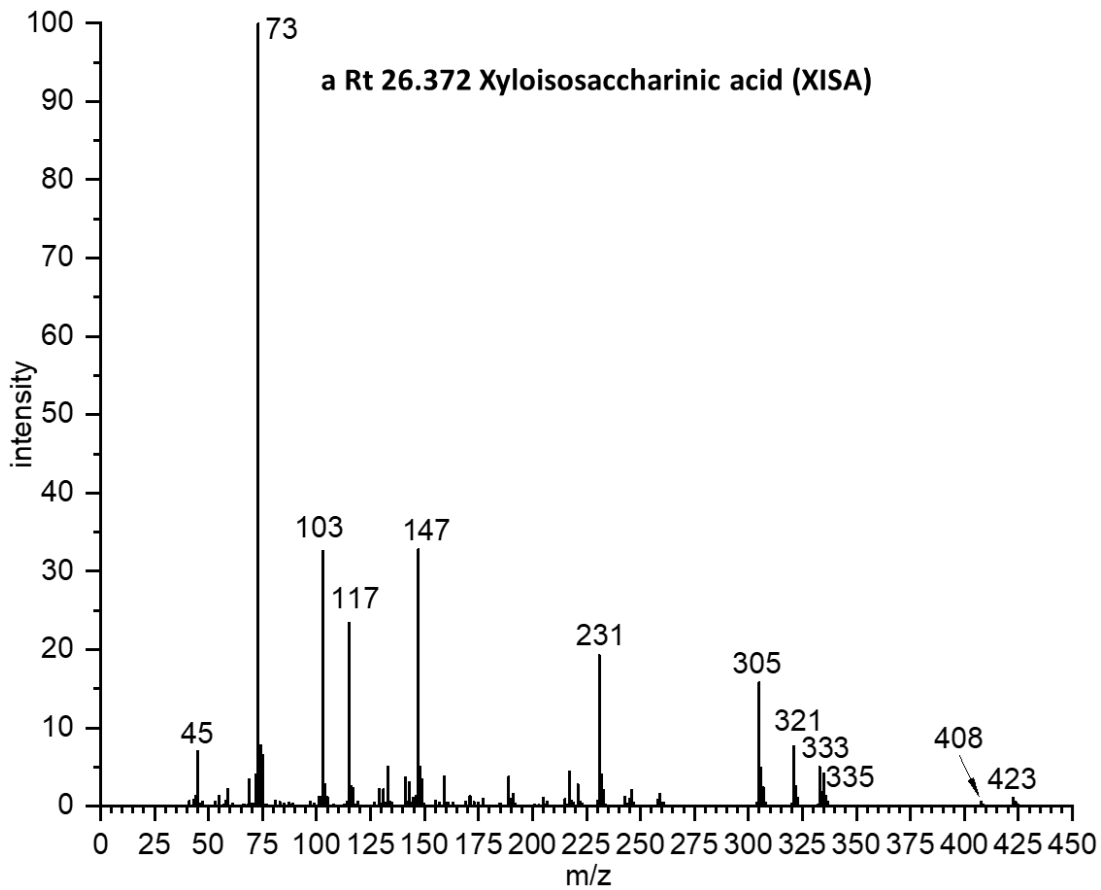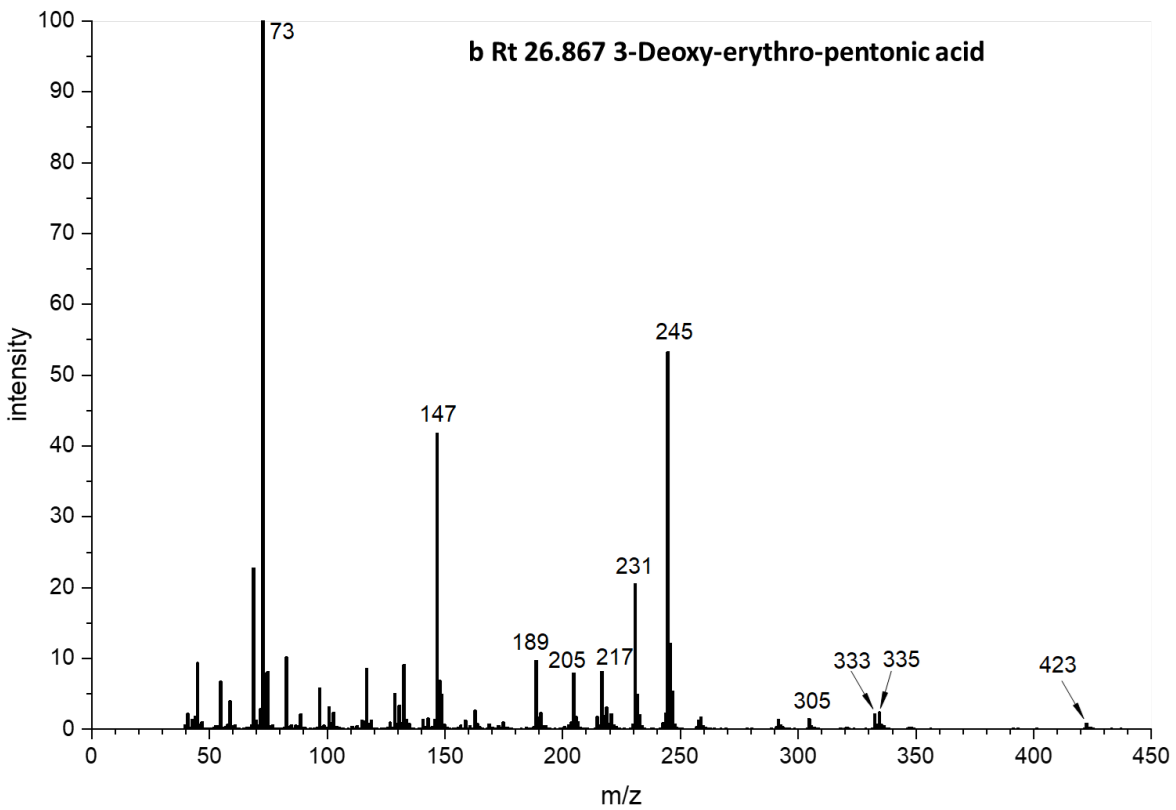

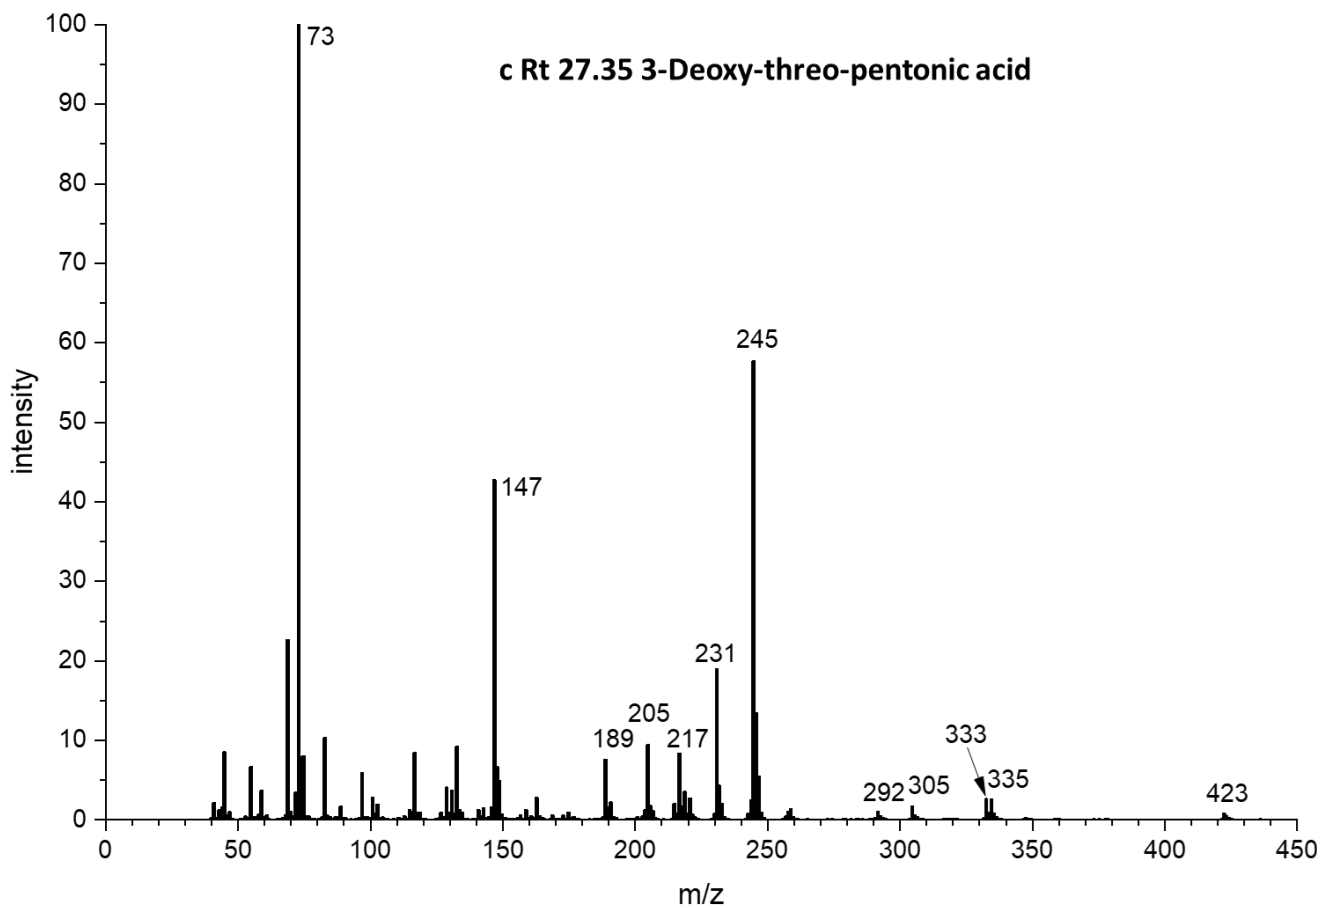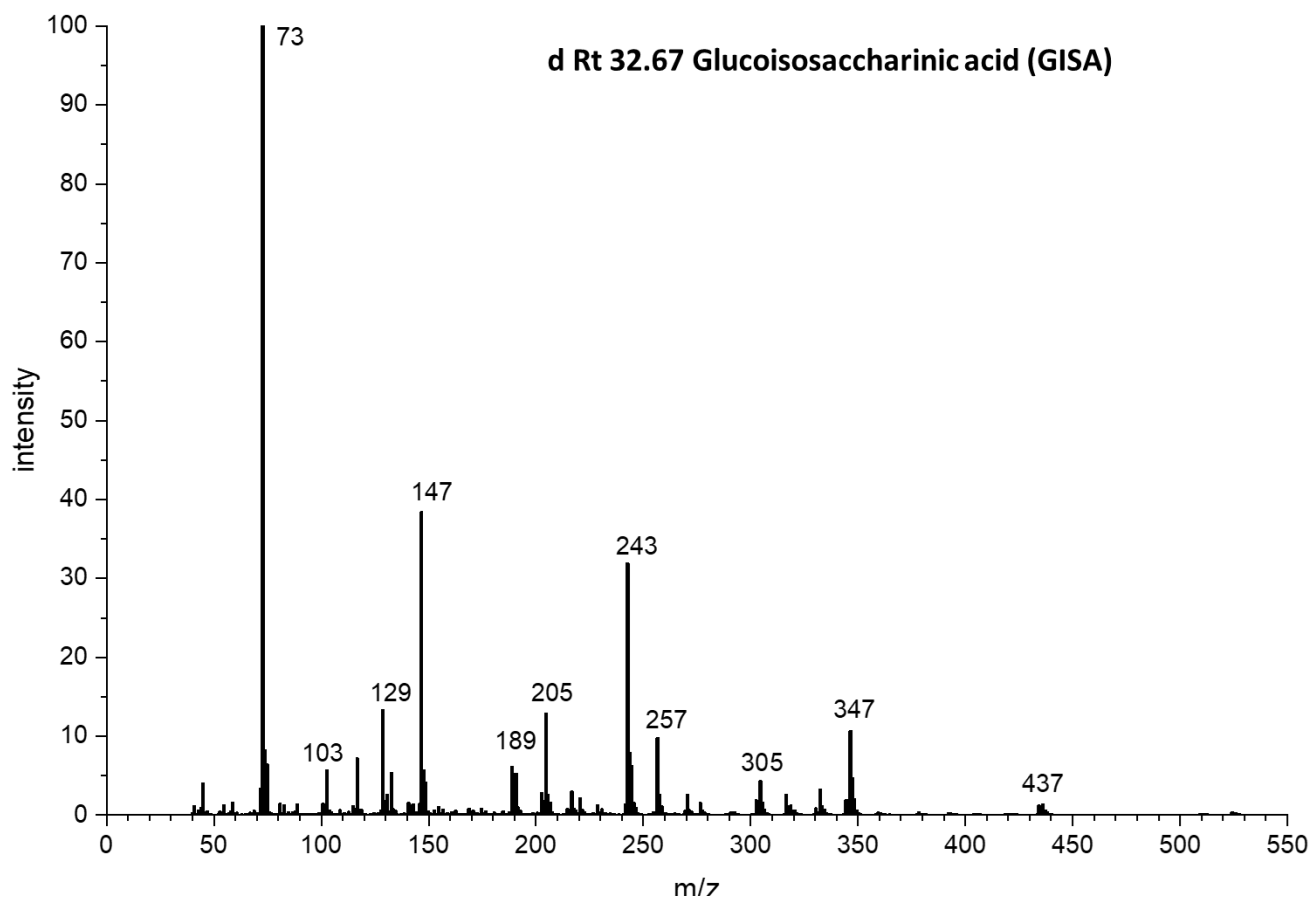

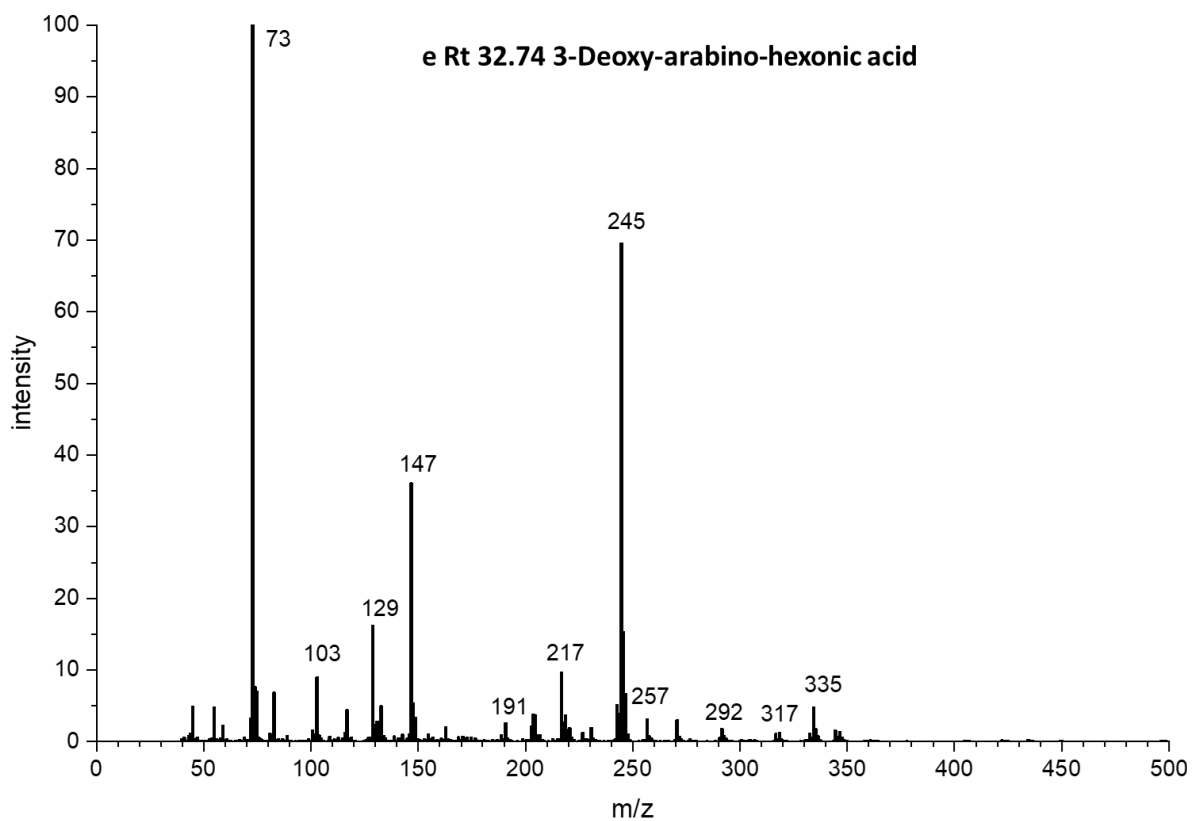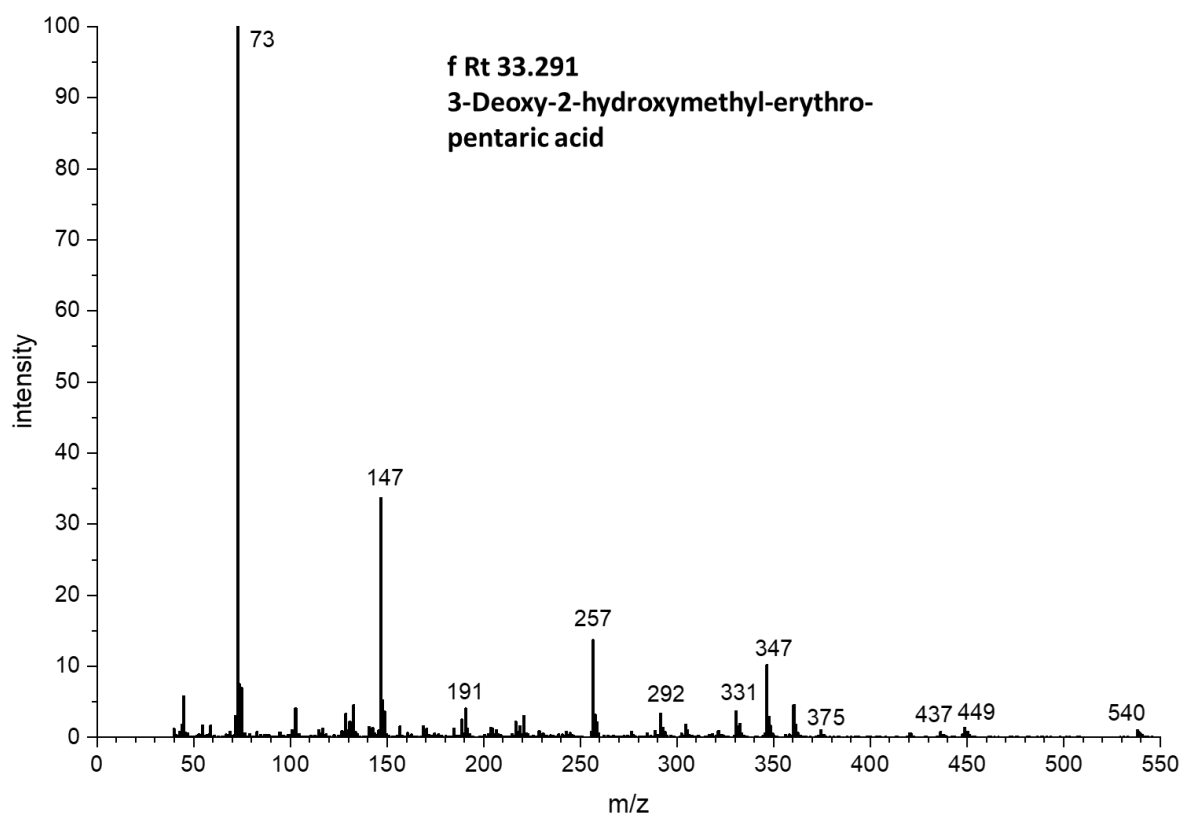

**Fig. S17** Mass spectrum of the TMS derivatives of some typical hydroxy acids collected from the spent liquor: **a** Rt 26.372 Xyloisosaccharinic acid (XISA); **b** Rt 26.867 3-Deoxy-erythro-pentonic acid; **c** Rt 27.35 3-Deoxy-threo-pentonic acid; **d** Rt 32.67 Glucoisosaccharinic acid (GISA); **e** Rt 32.74 3-Deoxy-arabino-hexonic acid; **f** Rt 33.291 3-Deoxy-2-hydroxymethyl-erythro-pentonic acid.

**Table S8** The quantitative profile (g/L) of the ultrafiltration-related: 1) Feed and 2) Permeate and 3) Retentate after the cut-off 0.5kDa.

| code | Ret. Time/ | Compound (TMS derivatized form)                                     | Feed  | Permeate | Retentate | MW  | Characteristic fragments m/z          | References and databases |
|------|------------|---------------------------------------------------------------------|-------|----------|-----------|-----|---------------------------------------|--------------------------|
| 1    | 7.167      | Lactic acid (TMS ester, TMS ether)                                  | 0.28  | 0.18     | 0.03      | 234 | 219; 191; 147; 117; 73                | [N]                      |
| 2    | 7.251      | $\alpha$ -Hydroxyisobutyric acid (TMS ester, TMS ether)             | 0.01  | 0.01     |           | 248 | 233; 205; 147; 131                    | [N]                      |
| 3    | 7.633      | Glycolic acid (TMS ester, TMS ether)                                | 0.15  | 0.11     | 0.02      | 220 | 205; 177; 147; 73                     | [N]                      |
| 4    | 9.482      | 2-Hydroxybutanoic acid (2-HBA) (TMS ester, TMS ether)               | 0.25  | 0.17     | 0.03      | 248 | 233; 205; 147; 131; 73                | [N]                      |
| 5    | 9.676      | Oxalic acid (di TMS ester)                                          | 0.04  | 0.02     | 0.003     | 234 | 219; 190; 147; 73                     | [N]                      |
| 6    | 10.006     | Hydracrylic acid (TMS ester, TMS ether)                             | 0.004 | 0.0027   |           | 234 | 219; 177; 147; 73                     | [N]                      |
| 7    | 11.313     | Orthosilicic acid (tetra TMS ether)                                 | 0.001 | 0.001    |           | 384 | 369; 281; 147; 73                     | [N]                      |
| 8    | 13.255     | 4-Hydroxybutanoic acid (TMS ester, TMS ether)                       | 0.012 | 0.01     |           | 248 | 233; 147; 117; 73                     | [N]                      |
| 9    | 13.421     | Benzoic Acid (TMS ester)                                            |       | 0.0015   |           | 194 | 194; 179; 135; 105; 77                | [N]                      |
| 10   | 14.898     | Glycerol (tri TMS ether)                                            | 0.014 | 0.02     |           | 308 | 293; 218; 205; 147; 73                | [N]                      |
| 11   | 15.965     | Succinic acid (di TMS ester)                                        | 0.013 | 0.01     |           | 262 | 262; 247; 147; 133; 129; 75; 73       | [N]                      |
| 12   | 16.402     | Methylsuccinic acid (di TMS ester)                                  | 0.004 | 0.002    |           | 276 | 261; 232; 217; 147; 129; 73           | [N]                      |
| 13   | 16.402     | 2,3-Dihydroxy-2-methylpropanoic acid (TMS ester, di TMS ether)      | 0.004 | 0.002    |           | 336 | 336; 321; 306; 233; 219; 147          | [N]                      |
| 14   | 16.734     | 2-Hydroxyhexanoic acid (TMS ester, TMS ether)                       | 0.002 | 0.001    |           | 276 | 261; 233; 159; 147; 73                | [N]                      |
| 15   | 16.835     | Glyceric acid (TMS ester, di TMS ether)                             | 0.004 | 0.0035   |           | 322 | 307; 292; 205; 189; 147; 133; 103; 73 | [N]                      |
| 16   | 17.643     | 4-Hydroxybenzaldehyde (TMS ether)                                   | 0.009 | 0.01     |           | 194 | 194; 179; 151                         | [N]                      |
| 17   | 18.890     | Tartronic acid (TMS ether, di TMS ester)                            | 0.011 | 0.001    |           | 336 | 321; 292; 221; 147; 133; 102; 73      | [N]; [A]                 |
| 18   | 19.529     | 2,4-Dihydroxybutanoic acid (TMS ester, di TMS ether)                | 0.021 | 0.02     | 0.001     | 336 | 321; 219; 203; 147; 129; 103; 73      | [N]                      |
| 19   | 21.225     | 4-(2-amino-1-hydroxyethyl)phenol (di TMS ether)                     | 0.012 | 0.01     |           | 297 | 282; 267; 193; 73                     | [N]                      |
| 20   | 21.956     | Malic acid (di TMS ester, TMS ether)                                | 0.012 | 0.01     |           | 350 | 335; 307; 245; 233; 147; 73           | [N]                      |
| 21   | 22.526     | 2,5- Dihydroxy pentanoic acid (2,5-DHPA ) (TMS ester, di TMS ether) | 0.096 | 0.08     | 0.01      | 350 | 335; 233; 217; 147; 143; 73           | 17                       |
| 22   | 22.880     | Vanillin (TMS ether)                                                | 0.004 | 0.0029   |           | 224 | 224; 209; 194; 73                     | [N]                      |
| 23   | 24.514     | 2-Hydroxyglutaric acid (TMS ether, di TMS ester)                    | 0.012 | 0.005    |           | 364 | 349; 247; 203; 147; 133; 129; 73      | [N]                      |

|    |        |                                                                             |          |        |       |     |                                                      |        |
|----|--------|-----------------------------------------------------------------------------|----------|--------|-------|-----|------------------------------------------------------|--------|
| 24 | 24.587 | 2-Hydroxy-2-methylpentanedioic acid (di TMS ester, TMS ether)               | 0.001492 | 0.001  |       | 378 | 363; 335; 261; 147; 143                              | [N]    |
| 25 | 26.372 | Xyloisosaccharinic acid (XISA) (tri TMS ether; TMS ester)                   | 0.105    | 0.08   | 0.01  | 438 | 423; 408; 333; 321; 305                              | 9      |
| 26 | 26.867 | 3-Deoxy-erythro-pentonic acid (TMS ester, tri TMS ether)                    | 0.015    | 0.01   | 0.002 | 438 | 423; 335; 305; 245; 205; 147; 133; 73                | 17;18  |
| 27 | 27.252 | 2-Hydroxyadipic acid (di TMS ester, TMS ether)                              | 0.005    | 0.002  |       | 378 | 363; 335; 261; 245; 203; 171; 147; 129; 73           | [N]    |
| 28 | 27.353 | 3-Deoxy-threo-pentonic acid (TMS ester, tri TMS ether)                      | 0.049    | 0.04   | 0.004 | 438 | 423; 335; 305; 245; 205; 147; 133; 73                | 17;18  |
| 29 | 27.701 | Syringaldehyde (TMS ether)                                                  | 0.002    | 0.002  |       | 254 | 254; 239; 224                                        | [N]    |
| 30 | 28.238 | Levoglucofan (tri TMS ether)                                                | 0.002    | 0.001  |       | 378 | 333; 217; 204; 147; 117; 103; 73                     | [N]    |
| 31 | 29.467 | Vanillic acid (TMS ether, TMS ester)                                        | 0.003    | 0.001  |       | 312 | 312; 297; 282; 267; 253; 223; 193; 165; 133; 126; 73 | [N]    |
| 32 | 32.665 | Glucosiosaccharinic acid (GISA) (tetra TMS ether, TMS ester)                | 0.134    | 0.10   | 0.01  | 540 | 525; 435; 347; 243; 205; 147; 129; 73                | 17; 19 |
| 33 | 32.706 | 3-Deoxy-arabino-hexonic acid (TMS ester, tetra TMS ether)                   | 0.025    | 0.02   |       | 540 | 525; 335; 245; 217; 147; 129                         | 17; 19 |
| 32 | 32.940 | Glucosiosaccharinic acid (GISA) (tetra TMS ether, TMS ester)                | 0.061    | 0.05   | 0.005 | 540 | 525; 435; 347; 243; 205; 147; 129; 73                | 17; 19 |
| 34 | 32.998 | Syringic acid (TMS ester, TMS ether)                                        | 0.002    | 0.0027 |       | 342 | 342; 327; 312; 297; 283; 253; 223                    | [N]    |
| 35 | 33.291 | 3-Deoxy-2-hydroxymethyl-erythro-pentanic acid (di TMS ester, tri TMS ether) | 0.006    | 0.0030 |       | 555 | 540; 449; 437; 375; 347; 331; 292; 257               | 17; 19 |
| 36 | 33.803 | 4-Coumaric acid (TMS ester, TMS ether)                                      | 0.005    | 0.002  |       | 308 | 308; 293; 249; 219; 73                               | [N]    |
| 37 | 33.858 | 3-Deoxy-2-hydroxymethyl-threo-pentanic acid (di TMS ester, tri TMS ether)   | 0.002    | 0.002  |       | 555 | 540; 449; 437; 375; 347; 331; 292; 257               | 17; 19 |
| 38 | 37.462 | Ferulic acid (TMS ester, TMS ether)                                         | 0.003    | 0.001  |       | 338 | 338; 323; 308; 249; 219; 73                          | [N]    |
| 39 | 52.641 | 9,10,18-Trihydroxystearic acid (TMS ester, tri TMS ether)                   | 0.002    | 0.001  |       | 620 | 605; 515; 390; 317; 303; 217; 147; 129; 73           | [N]    |
